# 1 Spaceflight alters host-gut microbiota interactions

2 Gonzalez E.\*<sup>1,2</sup>, Lee M.D.\*<sup>3,4</sup>, Tierney B.T.<sup>5,6</sup>, Lipieta, N.<sup>7</sup>, Flores P.<sup>8</sup>, Mishra M.<sup>9</sup>, Beckett N.<sup>10</sup>, Karouia,  
3 F.<sup>3,4,11</sup>, Barker R.<sup>4,12,13</sup>, Jansen R.J.<sup>14,15</sup>, Green S.J.<sup>16</sup>, Wewing, S.<sup>17</sup>, Broddrick J.<sup>18</sup>, Kelliher, J.<sup>19</sup>, Singh N.K.<sup>20</sup>,  
4 Bezdán, D.<sup>13,21,22</sup>, Galazska J.<sup>18</sup> and Brereton N.J.B.<sup>23</sup>✉

- 5  
6 1. Microbiome Unit, Canadian Centre for Computational Genomics, Department of Human Genetics, McGill University, Montréal, Canada  
7 2. Centre for Microbiome Research, McGill University, Montréal, Canada  
8 3. Exobiology Branch, NASA Ames Research Centre, Moffett Field, CA, USA  
9 4. Blue Marble Space Institute of Science, Seattle, WA, USA  
10 5. Department of Physiology and Biophysics, Weill Cornell Medicine, New York, NY, USA  
11 6. Department of Genetics, Harvard Medical School, Boston, MA, USA  
12 7. Broad Institute of Massachusetts Institute of Technology and Harvard, Cambridge, MA 02142, USA  
13 8. BioServe Space Technologies, University of Colorado Boulder, Boulder, CO, USA  
14 9. Princeton University, Princeton, New Jersey 08544 USA  
15 10. University of Nottingham, Nottingham NG7 2RD, United Kingdom  
16 11. Centre for Space Medicine, Baylor College of Medicine, Houston, TX, USA  
17 12. Yuri GmbH, Wiesentalstr. 40, 88074 Meckenbeuren, Germany  
18 13. University of Wisconsin-Madison, Madison, Wisconsin, USA  
19 14. Department of Public Health, North Dakota State University, Fargo, ND, USA  
20 15. Genomics, Phenomics, and Bioinformatics Program, North Dakota State University, Fargo, ND, USA  
21 16. Genomics and Microbiome Core Facility, Rush University Medical Centre, 1653 W. Congress Parkway, Chicago, IL 60612, USA  
22 17. Institute of Computer Science, Martin-Luther University Halle-Wittenberg, Halle, Germany  
23 18. Space Biosciences Research Branch, NASA Ames Research Centre, Moffett Field, California, United States  
24 19. Bioscience Division, Los Alamos National Laboratory, Los Alamos, NM, United States  
25 20. Biotechnology and Planetary Protection Group, Jet Propulsion Laboratory, California Institute of Technology, Pasadena, CA 91109, USA  
26 21. Institute of Medical Genetics and Applied Genomics, University of Tübingen, Tübingen, Germany  
27 22. NGS Competence Centre Tübingen (NCCT), University of Tübingen, Tübingen, Germany  
28 23. School of Biology and Environmental Science, University College Dublin, Dublin, Ireland  
29 ✉ Nicholas J. B. Brereton ([nicholas.brereton@ucd.ie](mailto:nicholas.brereton@ucd.ie))

## 30 Abstract

31 The rodent habitat on the International Space Station has provided crucial insights into the impact of  
32 spaceflight on mammals, including observation of symptoms characteristic of liver disease, insulin  
33 resistance, osteopenia and myopathy. Although these physiological responses can involve the microbiome  
34 when observed on Earth, changes in host-microbiota interactions during spaceflight are still being  
35 elucidated. Here, NASA GeneLab multiomic data from the Rodent Research 6 mission are used to  
36 determine changes to gut microbiota and murine host colon and liver gene expression after 29 and 56-days  
37 of spaceflight. Using hybrid amplicon and whole metagenome sequencing analysis, significant spaceflight-  
38 associated alterations to 42 microbiome species were identified. These included relative reductions of  
39 bacteria associated with bile acid and butyrate metabolism, such as *Extibacter muris* and *Dysosmobacter*  
40 *welbionis*. Functional prediction suggested over-representation of fatty acid and bile acid metabolism,  
41 extracellular matrix interactions, and antibiotic resistance genes within the gut microbiome, while host  
42 intestinal and hepatic gene expression described corresponding changes to host bile acid and energy  
43 metabolism, and immune suppression from spaceflight. Taken together, these changes imply that  
44 interactions at the host-gut microbiome interface contribute to spaceflight pathology and highlight how  
45 these interactions might critically influence human health and the feasibility of long-duration spaceflight.

46

47

48

49

50

51

52

53

54 Key words: multiomics, microbiome, metagenomics, transcriptomics, spaceflight pathology

55 **Word counts:** Main text = 5515 words (not inc: abstract, methods, figure legends, references).

## 56 1 Introduction

57 The International Space Exploration Coordination Group, representing 27 of Earth's space agencies, has  
58 outlined a clear target for a crewed mission to Mars in the Global Exploration Roadmap<sup>1,2</sup>, and sustainable  
59 long-term lunar exploration as a platform to develop the capabilities necessary to enable this ambitious  
60 goal. These guiding objectives have driven development of the imminent commercial low Earth orbit (LEO)  
61 destinations and Gateway, and the Artemis mission goal of a permanent lunar surface habitat by the early  
62 2030s<sup>3</sup>. Major challenges associated to longer duration spaceflight and habitation off-Earth are identified in  
63 the NASA Moon to Mars Objectives<sup>4</sup>, including the goal to advance understanding of how biology responds  
64 to the Moon, Mars, and deep space to support safe human space missions.

65 Consistently observed spaceflight-associated pathologies, notably disrupted glucose metabolism  
66 characterized by insulin resistance and lipid metabolism dysregulation, pose significant risks to astronaut  
67 health<sup>5,6</sup>. Research in tissue culture using the high aspect ratio vessel simulated microgravity model system  
68 developed at the NASA Johnson Space Centre characterised increases in pancreatic production of  $\alpha$ -TNF,  
69 which increased insulin resistance and decreased glucose utilisation in adipocytes<sup>7</sup>. In mice, a reduction of  
70 insulin sensitivity has been observed after microgravity simulation using hindlimb unloading<sup>8</sup>. This is  
71 reflected in the muscle transcriptome after spaceflight, where insulin receptor signalling is suggestive of  
72 disrupted glucose homeostasis<sup>9</sup>.

73 Similarly, simulated microgravity on human oligodendrocyte<sup>10</sup> and mesenchymal stem<sup>11</sup> cell cultures  
74 increases production of fatty acids and complex lipids. In the nematode *Caenorhabditis elegans*, the  
75 intestinal lipid metabolic sensors SBP-1 and MDT-15 respond to simulated microgravity, with RNAi  
76 knockdown of *sbp-1* and *mdt-15* reducing lipid toxicity<sup>12</sup>. Spaceflight metabolic studies from the Bion space  
77 program (Kosmos 605, 690, 782, 936 and 1887 (1973-87))<sup>13-15</sup> characterised rats as hyperlipidemic, with  
78 spaceflight inducing elevated serum or hepatic fatty acids, and substantial increases in cholesterol (67%).  
79 Similar lipid dysregulation, suggestive of non-alcoholic fatty liver disease (NAFLD), has been a consistently  
80 observed mammalian response to spaceflight alongside aligned disruption of insulin metabolism and  
81 glucose homeostasis<sup>16-20</sup>. These observations in mice and humans on the ISS include widespread changes in  
82 the hepatic proteins which drive lipid metabolism, significant increases in steatosis, cholesterol and low-  
83 density lipids and reduced high-density lipids.

84 The immune system can be compromised by spaceflight, both in space and after return to Earth. Despite  
85 quarantine before flight, infection with influenza and *Pseudomonas aeruginosa* have been observed in  
86 astronauts<sup>21</sup>. Up to 50% of astronauts also exhibit immunodeficiency upon returning to Earth<sup>22</sup>, leaving  
87 them vulnerable to infection. This dysregulation manifests through decreased T cell and B cell abundance<sup>23</sup>,  
88 and impaired natural killer cell and macrophage function<sup>24,25</sup>. The underlying cause of these changes are  
89 thought to be driven by microgravity, isolation, and stress associated with spaceflight<sup>26</sup>, as well as shifts in  
90 the gut microbiome<sup>27</sup>. On Earth, comparable changes in muscle integrity, glucose homeostasis, lipid  
91 metabolism, immune and psychophysiological function have been associated to gut microbiota<sup>28-32</sup>.  
92 Similarly, unique built environment surface microbiology arises from long-duration confinement, reshaping  
93 the bidirectional exchanges between usually diverse environmental microbial ecosystems and the gut  
94 microbiome to promote opportunistic pathogenicity<sup>33-37</sup>.

95 Given the potential involvement of gut microbiota in spaceflight pathology, and their essential role in  
96 mediating healthy human metabolic function on Earth, there has been increasing research into gut  
97 microbiome dynamics associated with spaceflight. Using 16S ribosomal RNA gene (16S rRNA) amplicon  
98 sequencing, Jiang et al<sup>38</sup> identified significant changes in the relative abundance of 16 OTUs in the gut  
99 microbiome of mice in Rodent Research (RR) 1 (RR-1) mission, some of which were annotated as within the  
100 genera *Staphylococcus* and *Tyzzereilla*, and were lower in mice after spaceflight compared to ground  
101 controls. More recently, Bedree et al.<sup>39</sup> explored the gut microbiome of mice flown in the RR-5 mission  
102 using 16S rRNA amplicon sequencing and whole metagenome sequencing (WMS). Amplicon analysis  
103 identified 14 ASVs as different in relative abundance ( $p < 0.05$ ) between spaceflight (ISS) and ground  
104 controls after 9 weeks of spaceflight, including increases in the genera *Clostridium*, *Romboutsia*,  
105 *Ruminiclostridium*, and *Shuttleworthia*, and decreases in *Hungatella*, while WMS identified significant  
106 enrichment of *Dorea* sp. and the species *Lactobacillus murinus*.

107 In this study, species-resolved 16S rRNA amplicon sequencing and *de novo* co-assembled WMS were  
108 employed to capture metagenomic changes in the murine gut microbiome associated with spaceflight  
109 across multiple samples as part of the RR-6 mission (Fig 1AB). Intestinal and hepatic transcriptomics were  
110 then used to assess the associated gene expression response of mice to spaceflight.

## 111 2 Results and discussion

### 112 2.1 Spaceflight increased total body weight

113 Although reduced muscle mass and bone density in astronauts and mice during spaceflight are commonly  
114 observed<sup>40,41</sup>, in this study, total mouse body weight was trending to increase after 29 days of spaceflight in  
115 Live Animal Return mice (FLT\_LAR; n= 9) and significantly increased after 56 days of spaceflight in ISS mice  
116 (FLT\_ISS; n= 7, p<0.05). Carcass mass did not differ significantly (t-test, p>0.05) between Ground Control  
117 Live Animal Return (GC\_LAR; n= 7) and FLT\_LAR mice, which weighed 28.9 g<sup>-1</sup> (±1.6) and 30.1 g<sup>-1</sup> (±1.4),  
118 respectively, but did significantly (t-test, p<0.05) increase from 28.4 g<sup>-1</sup> (±1.4) in Ground Control ISS (GC\_ISS;  
119 n = 9) mice to 32.9 g<sup>-1</sup> (±1.0) in FLT\_ISS mice (Supplementary document 1). Suzuki et al.<sup>42</sup> observed similar  
120 increases in the mouse habitat unit 3 mission and attributed these changes to substantial increases in both  
121 white and brown adipose tissue, and large increases in total plasma cholesterol and triglyceride levels.  
122 While healthy adipose cells play an important role in maintaining insulin sensitivity, dysregulated adipose  
123 can lead to production of pro-inflammatory and insulin-antagonistic molecules<sup>43,44</sup>.

### 124 2.2 Spaceflight alters murine gut microbiota

125 Insulin resistance and lipid accumulation are common spaceflight phenotypes<sup>45</sup> which are influenced by  
126 short chain fatty acids (SCFAs) and can be improved through butyrate dietary interventions in ground-based  
127 murine studies<sup>46,47</sup>. As butyrate and other SCFAs are predominantly produced by bacteria within the gut<sup>48</sup>,  
128 alterations in RR6 gut microbiome composition were explored. Characterisation of microbiota used 16S  
129 rRNA amplicon sequencing as well as WMS sequencing from faecal samples collected from GC\_LAR and  
130 FLT\_LAR (after 29 days of spaceflight) as well as GC\_ISS and FLT\_ISS mice (after 56 days of spaceflight).

131 Sequencing of amplicon libraries generated 2,146,311 sequences after quality control, with an average of  
132 77,015 ± 853 per sample (Fig 2A-F; Supplementary file 1). A total of 133 exact sequence variants (ESVs)  
133 were inferred across all samples; these ESVs accounted for 1,959,722 (91.32%) of reads. Thirty-five ESVs  
134 were annotated as putative bacterial species, 12 at genera level and 11 at family level, with an average of  
135 >99.9% nucleotide identity, while 74 ESVs were dissimilar to any well-characterised taxa (<99% nucleotide  
136 identity; 14 of which were flagged as putative chimeras). Most counts (73.1%) were captured by ESVs  
137 annotated as putative species, 24 of these could be assigned to a single species and 11 to multiple species  
138 which share identical rRNA gene sequences at the V4 region of the 16S rRNA gene. Bacterial species  
139 putatively identified across all mice using amplicons belonged to the phyla Firmicutes (28), Proteobacteria  
140 (4), Actinobacteria (1), Deferribacteres (1) and Bacteroidetes (1). *Parabacteroides goldsteinii* had the  
141 highest relative abundance throughout the samples and accounted for 53.7% of sequence counts.

142 WMS of faecal DNA generated 277,294,078 reads after quality control, with an average of  
143 8,665,440±1,423,541 per sample (Fig 2G-K; Supplementary file 2). Co-assembly across all 32 mice  
144 generated 219,259 contigs and back-mapping captured 85.1% of raw counts after mouse filtering  
145 (154,692,394 counts). After sparsity (>90% counts in a single sample) and minimum sample (<3) occurrence  
146 filtering to allow statistical detection of spaceflight associated differences across biological replicates,  
147 45,890 contigs remained which captured 154,234,982 counts. These contigs were provisionally annotated  
148 (>90% nucleotide identity) as putative bacteria (27.6%), viruses (0.8%) and metazoa (0.1%), or were  
149 unknown (71.5%), and included 11,936 contigs which could be provisionally annotated from 162 species  
150 and shared an average of 98.93% average nucleotide identity (ANI) with known species or strains (and  
151 capturing 84.96% of total counts) (Fig 2K; Supplementary file 3). Grouping WMS contigs by species  
152 annotation and filtering for high confidence (>97% ANI, and >2000nt total length) identified 79 species of  
153 bacteria representing 66 species within Firmicutes, and 6 Actinobacteria, 4 Proteobacteria, 1 Bacteroidetes,  
154 1 Spirochaetes and 1 Deferribacteres, as well as the helminth, *Trichinella nativa*. These species groups  
155 ranged from 1 to 2056 contigs, with an average total alignment length of >950,000 nt and an ANI of 98.8%  
156 (Supplementary file 3). Prevalent taxa included *P.goldstienii* representing 37%, *Enterocloster*  
157 *clostridioformis* representing 5% and all other species representing below 1% of relative abundance across

158 all mice, including non-bacterial species such as *Trichinella nativa*, representing 0.04% of relative  
159 abundance and present in all mice. *P. goldsteinii* is a ubiquitous commensal gut microbiome inhabitant in  
160 mice, and the species includes strains that play a role in reducing intestinal inflammation and maintaining  
161 intestinal epithelial integrity<sup>49,50</sup>.

162 Microbial alpha diversity indices did not significantly differ between mice groups using 16S rRNA amplicon  
163 sequencing or WMS data (Fig 2D; Supplementary file 1). Canonical Correspondence Analysis showed both  
164 FLT\_ISS and GC\_ISS as well as FLT\_LAR and GC\_LAR samples segregated by group, and the first axes  
165 explained 17.63% and 25.46% of variation using 16S rRNA gene amplification and 19.41% and 11.49% of  
166 variation using WMS, respectively. ANOVA-like permutation tests confirmed significant variation between  
167 groups under constraint for both amplicon and WMS data (Fig 2EJ;  $p < 0.05$ ; Supplementary file), suggesting  
168 spaceflight influenced gut microbiota in both comparisons regardless of the metagenomic approach taken.

169 **2.2.1 Significant spaceflight changes in the microbiome community are associated with short-**  
170 **chain fatty acid metabolism, bile acid conversion and pathogenicity**

171 Differential abundance analysis of amplicon data identified 45 ESVs that were significantly different in  
172 relative abundance between spaceflight and ground control mice, including 34 ESVs between GC\_LAR and  
173 FLT\_LAR and 18 ESVs between GC\_ISS and FLT\_ISS (Fig 3A and B). Although there were divergent changes in  
174 the relative abundance of *H. xylanolytica*, the common significant enrichment of *E. muris* and *D. welbionis*  
175 in mice after 29 and 56 days of spaceflight, compared to separate matched control groups, suggests  
176 spaceflight had some common influence of gut microbiota which persisted over the 29-56 days onboard  
177 the ISS as well as some distinct effects over time.

178 Differential abundance analysis of WMS identified 13,996 contigs that were significantly different (DESeq2  
179 FDR < 0.1) in relative abundance between spaceflight and ground control mice, including 11,087 between  
180 GC\_LAR and FLT\_LAR, and 3,997 between GC\_ISS and FLT\_ISS (Fig 3C-H). From these, 30 putative species  
181 (99.0% ANI; Supplementary file 3) identified as significantly differentially abundant between GC\_LAR and  
182 FLT\_LAR (Fig 3I) with an average total length of 433,429 nt per species, while 30 species (98.9% ANI)  
183 significantly differed between GC\_ISS and FLT\_ISS (Fig 3J) with an average total length of 191,542nt.

184 *D. welbionis* was recently characterised by Roy et al<sup>51,52</sup> as a butyrate producer likely present in the gut of  
185 most humans and was negatively correlated with BMI in obese individuals with metabolic syndrome. The  
186 same team used murine supplementation experiments to illustrate that *D. welbionis* could partially  
187 counteract insulin resistance, adipose tissue hypertrophy and inflammation as well as suggest a potential  
188 association with mitochondrial content and activity in adipose tissue after high fat diet induction of  
189 obesity<sup>52</sup>. In mice, changes in microbially produced butyrate are also known to directly influence expression  
190 of hepatic circadian clock regulating genes, such as *Per2* and *Bmal1*, in a bidirectional interaction which can  
191 disrupt host metabolism<sup>53</sup>. Enrichment of *D. welbionis* in both groups of spaceflight mice (fig 3ABIJ)  
192 compared to their respective ground controls here is therefore noteworthy given the high lipid  
193 accumulation, liver and mitochondrial dysfunction phenotype repeatedly observed in rodent research  
194 missions and astronauts<sup>17,18,45</sup>. Whether the relative increase of this species might be counteracting or  
195 contributing towards spaceflight pathology is unclear and merits further study. Conversely, other butyrate  
196 producers, such as *Intestinimonas butyriciproducens*<sup>54</sup>, were depleted after 29 days of spaceflight.

197 *L. murinus* and *A. muris* were depleted in mice during spaceflight (fig 3AI), as well as some *Enterocloster*  
198 species after 29 days of spaceflight, which can have high expression of bile salt hydrolases (BSHs), able to  
199 deconjugate bile salts into less toxic bile acids, and can promote microbially mediated 7 $\alpha$ -dehydroxylation  
200 of host primary bile acids into secondary bile acids<sup>55-59</sup>. Conversion of the major human primary bile acids in  
201 humans, cholic acid (CA) and chenodeoxycholic acid (CDCA), to the secondary BAs deoxycholic acid (DCA)  
202 and lithocholic acid (LCA), is mediated by a limited number of closely related clostridia containing the bile  
203 acid inducible (bai) operon, such as *Clostridium scindens*<sup>60,61</sup> which was significantly reduced in abundance  
204 after spaceflight (Fig 3IJ). The major murine primary bile acids also include  $\alpha$ - and  $\beta$ -muricholic acid ( $\alpha$ MCA  
205 and  $\beta$ MCA), which are transformed by 7 $\alpha$ -dehydroxylation to murideoxycholic acid (MDCA).

206 *E. muris*, which significantly increased in both spaceflight groups of mice compared to ground controls (Fig  
207 3ABIJ), has been recently characterised as 7 $\alpha$ -dehydroxylating in mice<sup>62</sup>, containing the bile acid inducible  
208 operons BaiBCDEFGI and BaiJKL, and BaiA, homologous to *Clostridium scindens*. The Bai operon enables *E.*

209 *muris* and *C. scindens* to increase concentrations of 7 $\alpha$ -dehydroxylated secondary BAs that alter the host  
210 bile acid pool and act as ligands to bile acid receptors to influence host inflammation, glucose and lipid  
211 metabolism<sup>62-66</sup>. For example, bile sensor farnesoid-X-receptor (FXR) modulates enterohepatic recirculation  
212 and host cholesterol metabolism through bile acid regulation of *cyp71A*<sup>66</sup>. Similarly, secondary bile acids  
213 such as DCA and LCA are potent agonists of the bile acid receptor TGR5, which controls glucose  
214 homeostasis in adipose tissue and muscle by altering intestinal cell release of the insulin secretion regulator  
215 glucagon-like peptide-1 (GLP-1)<sup>67-69</sup>. Liver production of  $\alpha$ -MCA and  $\beta$ -MCA (in mice) is mediated by *cyp2c70*  
216 genes<sup>70,71</sup> but 7 $\alpha$ / $\beta$ -dehydroxylation mediated by microbes such as *E. muris* can modify MCAs after  
217 epimerization into HDCA<sup>72</sup>, and critically regulate lipid metabolism<sup>73,74</sup>. Interestingly, *E. clostridioformis*,  
218 significantly higher in relative abundance after both 29 and 56 days of spaceflight (fig 3), is reported as  
219 increasing in the presence of *E. muris*<sup>62</sup> and harbours 7 $\alpha$ / $\beta$  hydroxysteroid dehydrogenases (HSDH)<sup>59,75</sup>,  
220 which can also transform primary and secondary BAs into oxo-bile acids<sup>64</sup>.

221 Immune suppression has previously been described as a response to spaceflight<sup>76</sup> and could result as bile  
222 acid dysregulation<sup>77,78</sup>. So increased relative abundance of *C. difficile* after both 29 and 56 days of  
223 spaceflight is of potential concern if toxigenic.

## 224 2.2.2 Changes in metagenome functional prediction

225 Metagenomic functional prediction identified 4,583,759 genes in the co-assembly generated from all 32  
226 mice, 392,631 of which were annotated by Kegg database (Supplementary file 4). Thus, a high proportion  
227 (91.4%) of genes, including differential abundant genes, remain unannotated. Kegg annotated genes  
228 included the pathogenicity locus (including *tcdAB*) from *C. difficile*, suggesting significant enrichment of the  
229 species after 29 and 56 days (fig 3IJ) could include a toxigenic strain. Bile acid metabolism genes were  
230 identified, including 17 bile salt hydrolases, including that from spaceflight enriched *A. muris* (*Cbh*), and 57  
231 non-redundant Bai genes, including from *C. scindens* (*BaiABCDEFGI*) and *I. butyriciproducens* (*BaiA* and  
232 *BaiCD*), species which were significantly depleted after spaceflight as well as *A. muris* (*BaiCD*), *E.*  
233 *massiliensis* (*BaiA*) and *B. pseudococcoides* (*BaiCD*), species which were significantly enriched after  
234 spaceflight (Supplementary file 2 and 3). *E. aldenensis* and *S. arabinosiphila* both contained the important  
235 *BaiCD* gene and were significantly enriched in mice after 29 days of spaceflight but significantly depleted  
236 after 56 days. Alongside significant enrichment of the rare 7 $\alpha$ -dehydroxylating *E. muris*, these shifts suggest  
237 dynamic changes in secondary bile acid production and potential influence on the composition of the host  
238 bile acid pool<sup>56,79</sup>.

239 Differential abundance analysis inferred 52,370 genes were significantly different (FDR < 0.1) in abundance  
240 after 29 days and 37,068 genes after 56 days of spaceflight, which could be assigned to 2,811 and 2,572  
241 unique KEGG ontology terms, respectively (Fig 4A). Over-representation analysis identified significant (FDR  
242 < 0.1) increases in pathways of interest related to fatty acid metabolism, bile acid metabolism,  
243 antimicrobial resistance and potential host interactions (ECM, carbohydrates and pathogenicity), after both  
244 29 days and 56 days of spaceflight compared to ground controls (Fig 4BC). Taken together, these significant  
245 changes in metagenomic gene inventories, and specific bacterial species with well-characterised functions,  
246 due to spaceflight suggest gut microbiome changes which should influence lipid and bile acid homeostasis,  
247 and the immune system of the murine host.

## 248 2.3 Spaceflight alters host intestinal gene expression

249 Faecal or serum fatty acid or bile acid concentrations were not measured within the Rodent Research 6  
250 mission; however, host colon and liver gene expression were assessed from all four groups of mice,  
251 allowing host responses to spaceflight at the host-gut microbiome interface to be investigated.

252 Host intestinal gene expression revealed extensive significant (FDR < 0.1) changes after 29 days and 56 days  
253 of spaceflight when compared to ground controls, including 4,613 differentially expressed (DE) genes  
254 between GC\_LAR and FLT\_LAR, and 4,476 DE genes between GC\_ISS and FLT\_ISS (Fig 5A-H; Supplementary  
255 document 1 and file 5). Of these, 43% and 44% were increased due to flight in LAR and ISS mice,  
256 respectively. Gene set enrichment analysis (GSEA) revealed consistent responses at a pathway level after  
257 29 days and 56 days of spaceflight (Fig 5IJ), including immune suppression, dysregulation of cholesterol  
258 and bile acid, and extracellular matrix (ECM) remodelling.

259 2.3.1 Intestinal bile acid and circadian rhythm gene expression

260 Significant microbiome alteration in some of the few well-characterised 7 $\alpha$ -dehydroxylating bacterial  
261 species, including increases in *E. muris* after 29 days and 56 days of spaceflight (below detection in ground  
262 controls) as well as depletion of *C. scindens*, suggests secondary bile acid production and the bile acid pool  
263 is likely altered in the murine gut during spaceflight. In the host intestine, bile acids are passively absorbed  
264 or actively taken up through the apical membrane by the apical sodium-dependent bile acid transporter,  
265 ASBT (*Slc10A2*), bound to the cytosolic ileal bile acid binding protein, IBABP (*Fabp6*), and then transported  
266 across the basolateral membrane by organic solute transporters, Ost $\alpha$  and Ost $\beta$  (*Slc51A* and *Slc51B*), or  
267 glucuronidated by UGTs (such as *Ugt1a1*) and exported back to the lumen by multidrug resistance-  
268 associated protein 2, MRP2 (*Abcc2* transporter)<sup>80,81</sup>. Increases in intestinal bile acid also activate the  
269 farnesoid X receptor (FXR) and retinoid X receptor  $\alpha$  (RXR $\alpha$ ) heterodimer which regulates production and  
270 secretion of fibroblast growth factor *FGF15/19*, the negative feedback hormone which travels through  
271 portal circulation to bind hepatic FGFR4 receptors which suppress liver bile acid biosynthesis via inhibition  
272 of *Cyp7A1*<sup>82</sup>.

273 After 29 days of spaceflight, *Abcc2* was significantly downregulated, suggesting reduced BA export to the  
274 colon, while *Asbt*, *Ibabp*, *Ost $\alpha$* , *Ost $\beta$*  and *Ugt1a1* were all significantly upregulated as well as *Rxra* (not *Fxr*),  
275 *Fgf15/19* and *Fgfr4* (Fig 5C; Supplementary document 1 and file 5). Taken together, these changes suggest  
276 spaceflight led to an alteration in bile acid metabolism in the intestine which would lead to bile acid  
277 suppression of hepatic *Cyp7A1* and accumulation of cholesterol or hypercholesterolemia<sup>83</sup>. Interestingly,  
278 intestinal *Cyp7A1* expression was identified as significantly repressed after 29 days of spaceflight. Previous  
279 proteomic research in Biom-1M mice suggested a decrease in bile secretion during spaceflight<sup>84</sup> while  
280 hepatic metabolite assessment of mice after spaceflight in the Space Shuttle Atlantis measured increased  
281 accumulation of cholate and taurodeoxycholate<sup>16</sup>. As the major cholesterol degradation mechanism in  
282 humans and mice is conversion to bile acids, cholesterol accumulation, alongside bile acid dysregulation  
283 and suppression of *Cyp7A1*, should increase direct intestinal cholesterol excretion<sup>85</sup>. Supporting this  
284 extrapolation, both cholesterol excretion transporter genes, *Abcg5* and *Abcg8*, were significantly  
285 upregulated in the intestine after 29 days of spaceflight.

286 After 56 days, intestinal *Cyp7A1* was still significantly repressed and both *Abcg5* and *Abcg8* upregulated,  
287 but GSEA indicated a further shift in intestinal bile acid metabolism (Fig 5I; Supplementary document 1).  
288 This was underlined by significant downregulation of the apical bile acid transporter *Asbt* compared to  
289 ground controls as well as *Ntcp* (*Slc10a1*)<sup>86</sup>, indicating a switch to active reduction in bile acid uptake.  
290 Coinciding with this was significant increases in expression of *Lxr $\beta$* , the liver x receptor gene expressed  
291 widely in different tissues, which can help prevent bile acid toxicity through induction of *Abcg5* and *Abcg8*  
292 mediated cholesterol excretion<sup>87-90</sup>.

293 In gene expression analysis of multiple tissues in mice after spaceflight, da Silveira et al.<sup>18</sup> found that  
294 enrichment within the circadian rhythm pathway of the kidney, liver, eye, adrenal gland and various muscle  
295 tissues. Within the intestine here, the major clock genes, the circadian locomotor output cycles kaput  
296 (*Clock*) and brain and muscle ARNT-like protein-1 (*Bmal1*; *Arntl*) transcription factors, were significantly  
297 upregulated after 29 days and 56 days of spaceflight, and the neuronal PAS Domain Protein 2 (*Npas2*) was  
298 upregulated after 56 days (Fig 5D; Supplementary document 1 and file 5). These regulate the major clock-  
299 controlled genes reverse-erythroblastosis (Rev-Er $\alpha$  and  $\beta$ ) and retinoic acid receptor-related orphan  
300 receptors, including gamma (*Rorc*)<sup>91</sup>, as well as *Period* (*Per1*, *Per2* and *Per3*), *Cryptochrome* (*Cry1* and *Cry2*)  
301 and basic Helix-Loop-Helix (bHLH) protein (*Dec1* and *Dec2*) genes<sup>92,93</sup>, all of which were significantly  
302 downregulated after 56 days of spaceflight except for *Rev-Er $\alpha$*  (*Nr1d1*) (only downregulated after 29 days).  
303 These genes can feedback to inhibit *Clock/Npas2* and *Bmal1* as part of a feedback loop<sup>94,95</sup>, and also  
304 regulate other the clock controlled genes such as *DBP*, *HLF* and *TEF*, significantly downregulated, and *Nfil3*  
305 (*E4BP4*), significantly upregulated after 56 days of spaceflight. These spaceflight-associated changes in core  
306 clock genes, such as upregulation of *Bmal1*, *Arntl* and *Npas2*, largely agree with those found in murine  
307 muscle tissue after longer-term spaceflight which were characterised as similar to age-related gene  
308 expression on earth<sup>96</sup>.

309 These clock genes regulate nutrient absorption, gut motility, intestinal barrier function and immunity<sup>92</sup> and  
310 have also been shown to require and interact with the microbiome, including in response to microbially-

311 derived molecules, such as butyrate and bile acids, and in direct response to microbial associated molecular  
312 patterns (MAMPs)<sup>53,92,97-99</sup>. In addition to the widespread intestinal gene expression responses to bile acids,  
313 the major butyrate receptor free fatty acid receptor 2 (*Ffar2*; *Gpr43*)<sup>100</sup> was significantly upregulated after  
314 56 days of spaceflight. Similarly, the archetypal intestinal MAMP recognising mannose-binding lectin genes,  
315 *Mbl-1* and *Mbl-2*<sup>101</sup>, were significantly downregulated. Furthermore, Wang et al<sup>102</sup> reported host immune  
316 responses to microbial flagellin and lipopolysaccharide in the intestine increased expression of IL-23, and IL-  
317 22, leading to a downregulation of *Rev-Erb* and subsequent upregulation of *Nfil3*, which in turn can regulate  
318 clock-associated nutrient absorption and immunity. Here, mice followed this specific expression pattern  
319 after spaceflight (Supplementary file 5), implying the spaceflight associated microbiome alterations could  
320 have been recognised and influenced these changes in clock gene expression.

### 321 2.3.2 Intestinal extracellular matrix remodelling and immune compromise during spaceflight

322 Changes in the extracellular matrix-receptor interactions pathway were underpinned by significant  
323 upregulation of collagens (*Col1a1-2*, *Col3a1*, *Col4a1-2*, *Col5a1-2*, *Col5a3*, *Col6a2-3*, *Col12a1*, *Col26a1*),  
324 laminins (*Lama3*), thrombospondin (*Thbs1*) and tenascins (*Tnc*) in mice after 29 days of spaceflight, which  
325 became more pronounced after 56 days of spaceflight (Fig 5E; Supplementary file 5). This coincided with  
326 upregulation of integrin (*Itga5* and *Itga7*) and matrix glycoprotein (*Sdc4* and *Gp5*) receptors, collectively  
327 implying extensive extracellular matrix remodelling during spaceflight. The ECM and mucosal collagen  
328 scaffold in particular are known to be shaped by microbiota<sup>103</sup>, as are mucins, which make up the intestinal  
329 mucus layer and have a dynamic relationship with commensal bacteria as well as serving as a critical barrier  
330 against colonisation by pathogenic bacteria<sup>104</sup>. Significant increase in the secretory mucin gene *Muc2* and  
331 significant decreases in the membrane bound *Muc3* and mucosal pentraxin 1 (*Mptx1*), three of the mostly  
332 highly abundant transcripts in the murine intestine here, were observed after 56 days of spaceflight,  
333 suggesting alterations to mucin within the intestinal lumen in direct contact with microbiota. Mucin 2  
334 (*Muc2*) is well characterised as regulated by intestinal bacteria, with O-glycans serving as nutrients and  
335 adhesion sites for microbiota<sup>105</sup>, but are also differentially expressed in response to pathogens<sup>104</sup>, including  
336 *Trichinella*<sup>106</sup>, identified here.

337 Extensive changes to mucosa were indicated by widespread downregulation of cell adhesion molecules  
338 during spaceflight, including downregulation of *CD8a* and *CD8b1* genes, genes encoding costimulatory  
339 molecules *CD2,6,80,86,40* and *ICOSL* within intestinal antigen presenting cells as well as their T cell  
340 activating binding partners *CD48,166,28* and *ICOS*<sup>107-109</sup> (Fig 5G; Supplementary file 5). Cytokine genes, such  
341 as the chemokine *Ccl22* and receptor *Ccr4* involved in the intestinal immune response to enteric bacterial  
342 pathogens in murine mucosa<sup>110</sup>, were also uniformly downregulated (Fig 5F), alongside others<sup>111-113</sup>:  
343 *Ccl3,5,6* and *22*, *Ccr4,7* and *9*, *Cxcr2,3* and *6*, *Il-5,7,12* and *16*, and *Il-2r,5r,7r,10r,12r,18r,21r,23r* and *27r*. An  
344 exception to this pattern of cytokine downregulation was upregulation IL-23 and IL-22, which interact with  
345 circadian regulation<sup>95</sup>, and specific members of the mucosal homeostasis critical interleukin 17 family<sup>114</sup>, *Il-  
346 17d*, which promotes pathogenicity during infection through suppression of CD8+ T cells<sup>115</sup>, and *Il-17rc*,  
347 which increases expression during compromised epithelial barrier integrity (wounding)<sup>116</sup>.

348 These expression profiles, alongside consistent downregulation of genes within the Intestinal IgA pathway  
349 (fig 5H), suggest suppression of immunity and widespread tissue remodelling at the host-gut microbiome  
350 interface in mice after spaceflight. This agrees with reports of reduced cytokine production in mice after  
351 simulated microgravity<sup>117</sup>, immune dysfunction in splenic tissue of mice after 13 days of spaceflight on the  
352 Space Shuttle Atlantis<sup>118</sup> and in astronauts, alongside increases in plasma cortisol concentration which  
353 reached Cushing syndrome levels, during spaceflight<sup>119</sup>. Taken together, this provides an insight into the  
354 role the host-gut-microbiome interface might play in the current broad consensus of immune dysregulation  
355 in spaceflight environments<sup>120</sup>.

## 356 2.4 Spaceflight alters gene expression in the liver

357 Hepatic gene differential expression analysis comparing mice after 29 days and 56 days in space to their  
358 relative ground controls identified 4,029 DE genes and 4,068 DE genes, respectively (FDR < 0.1; Fig 6AH;  
359 Supplementary document 1 and file 5). Of these, 48 % and 49% were increased due to 29 days and 56 days  
360 of spaceflight, respectively. GSEA of liver tissue responses also revealed highly consistent responses at the  
361 pathway level to 29 and 56 days of spaceflight (Fig 6IJ), including disruption of bile acid and energy  
362 metabolism.

#### 363 2.4.1 Bile acid disruption underlies hepatic cholesterol accumulation

364 The most abundant intestinal transcripts in mice after 56 days of spaceflight, differentially expressed and  
365 representing 8% and 9% of normalised counts, were from the non-coding RNA *Rn7s1* and *Rn7s2* genes (7S  
366 RNA 1 and 2; Supplementary file 5), respectively, which were recently characterised as inhibitors of global  
367 mitochondrial transcription in mammals<sup>121</sup>. This is consistent with the mitochondrial dysfunction  
368 highlighted as characteristic of spaceflight pathogenicity in recent multiomic analysis performed by de  
369 Silveira et al<sup>18</sup>, who also characterised compromised liver function in mice and astronauts after spaceflight  
370 compared ground controls, including upregulation of *Fgf21*, a negative repressor of bile synthesis<sup>122</sup>, and  
371 accumulation of total cholesterol (higher low-density lipoprotein cholesterol but decreased high-density  
372 lipoprotein cholesterol). Here, another potent repressor of *Cyp7A1* bile synthesis, fibroblast growth factor 1  
373 (*fgf1*)<sup>123</sup>, was upregulated in the liver of mice after 29 days of spaceflight, and the more well known *Fgf21*<sup>16</sup>  
374 was significantly upregulated in the liver after both 29 days and 56 days of spaceflight.

375 Within the liver, Sterol 14-demethylase (*Cyp51*) catalyses the transformation of lanosterol into cholesterol  
376 and *Cyp7A1* is then the first (and rate-limiting) enzymatic step in transformation of cholesterol in primary  
377 bile acid biosynthesis, which itself is strictly inhibited by bile acid concentrations<sup>124</sup>. The production of bile  
378 salts is then a stepwise transformation process dependent on gene expression of 3 beta-hydroxysteroid  
379 dehydrogenase type 7 (*Hsd3b7*) gene, cholic acid-specific *Cyp8b1* gene and acyl-Coenzyme A oxidase 2  
380 (*Acox2*) before conjugation by *Baat*, *Acnat1* and *Acnat2*, and subsequent excretion in the bile duct by bile  
381 salt exporter pump (BSEP)<sup>125,126</sup>. *Cyp51*, *Cyp8b1* and *Acox2* genes were significantly upregulated and *Cyp7a1*  
382 and *Fxr* (*Nr1h4*) were significantly downregulated in the liver of mice after 56 days on the ISS (Fig 6C;  
383 Supplementary document 1 and file 5). The cholesterol transporter genes *Abcg5* and *Abcg8* (intestinally  
384 upregulated after 29 and 56 days of spaceflight) were upregulated in the liver after 29 days, but no longer  
385 significantly upregulated after 56 days, and *Abcg8* was significantly downregulated. This reduction is  
386 surprising given the uniform accumulation of cholesterol observed after extended spaceflight; in contrast,  
387 *Bsep* and the bile acid conjugating acyl-coenzyme A:amino acid N-acyltransferase 1 and 2 (*Acnat1* and  
388 *Acnat2*; *Baatp1/2*) genes were significantly upregulated. Taken together, these expression profiles suggest  
389 hepatic accumulation of cholesterol, characteristic of glucose and lipid metabolic disruption<sup>97</sup>, and describe  
390 a subsequent increase in the production bile acids in the liver, preferentially cholic acid, their subsequent  
391 conjugation and export as bile salts, with the seemingly contradictory reduction in *Cyp7A1* consistent with  
392 feedback inhibition.

393 The other major mechanism for detoxification during cholesterol and bile acid accumulation in the liver is  
394 sulfonation of bile acids, the transfer of a sulfonate group to a hydroxyl (OH) by a subfamily of cytosolic  
395 sulfotransferases (*Sult2a* genes) which increases their solubility, decreases enterohepatic recirculation, and  
396 increase excretion<sup>127</sup>. After 29 days of spaceflight, hepatic *Sult2a1*, *Sult2a4* and *Sult2a5* were  
397 downregulated, which shifted to downregulation of *Sult2a7* and *Sult2a8* after 56days (Supplementary file  
398 5). In humans, bile acid sulfonation is catalysed by *Sult2a1*, which sulfonates the 3-OH of bile acids. In  
399 contrast, mice have 8 *Sult2a* genes, with *Sult2a1-6* sharing close homology to *Sult2a1* but *Sult2a8* being  
400 recently characterised as having major function in sulfonating 7 $\alpha$ -OH of bile acids<sup>128,129</sup>, of particular  
401 relevance here due to spaceflight microbiome changes in 7 $\alpha$ -dehydroxylating *E. muris* and *C. scindens*.  
402 Notably, during acute phase immune responses, alterations to fatty acid, cholesterol, and bile acid  
403 metabolism, *Sult2a1* is known to be suppressed by cholesterol and bile acid regulating nuclear *Fxr* (*Nr1h4*)  
404 and *Car* (*Nr1i3*) nuclear receptors<sup>130</sup>, the latter of which also regulates bile acid responsive transporter gene  
405 *Mdr1* (ABCB1)<sup>131</sup>, all three of which were downregulated after 56days of spaceflight (Fig 6c) and provide  
406 further evidence of bile acid dysregulation and toxic stress consistent with extensive disruption of the gut-  
407 liver axis<sup>132</sup>.

#### 408 2.4.2 Energy homeostasis disruption after spaceflight

409 Beheshti et al.<sup>17</sup> observed significant depletion in *Cyp7A1* protein levels in mice after spaceflight (RR1 and  
410 RR3), alongside disruption in glucose and lipid metabolism<sup>133</sup> as well as NAFLD<sup>134</sup>. Here, pathways related  
411 to energy homeostasis consistently altered in gene expression due to spaceflight after 29 and 56 days  
412 included enrichment of fatty acid degradation, insulin signalling and insulin resistance (Fig 6DE;  
413 Supplementary document 1 and File 5). The highest relative abundance (CPM) of transcripts significantly  
414 increased in the liver of mice after 56 days of spaceflight included fatty acid synthase (*Fasn*), the liver fat  
415 accumulation-associated carbonic anhydrase 3 (*Car3*)<sup>135</sup>, and the rate limiting enzyme for fatty acid



416 desaturation, Stearoyl-CoA desaturase (SCD), recently identified as a key role at the crossroads of immune  
417 response and lipid metabolism through interplay with PPAR $\gamma$ <sup>136</sup>, also significantly upregulated here (fig 6F).  
418 Glucose metabolism was also disrupted by spaceflight as the glucose transporter *Glut2* (*Slc2a2*) gene,  
419 required for glucose-stimulated insulin secretion<sup>137</sup>, and glycogen synthase 2 (*Gys2*) gene, the rate limiting  
420 enzyme for glycogenesis<sup>138</sup>, were downregulated in the liver (and intestine) after both 29 days and 56 days  
421 of spaceflight. The free fatty acid and glycolysis regulating *PPAR $\alpha$*  was also downregulated, and liver  
422 glycogen phosphorylase (*Pylg*) and glycogen synthase kinase 3 beta (*Gsk3 $\beta$* ) were significantly upregulated  
423 after 56 days of spaceflight (Fig 6G). Taken together, the indicated decrease in glycogen synthesis and  
424 increase in glycogenolysis is characteristic of insulin resistance leading to the elevated fasting plasma  
425 glucose to pre-diabetic levels previously observed in crew of the Mars500 analogue mission and during  
426 spaceflight<sup>139-141</sup>. Interestingly, in light of spaceflight induced changes to gut microbiota, upregulation of  
427 *Gsk3 $\beta$*  is also known to be activated by microbial-associated molecular patterns<sup>142</sup> and promotes acute liver  
428 failure through inhibition of the PPAR $\alpha$  pathway<sup>143</sup>.

429 Other pathways enriched in the liver after spaceflight included Cushing Syndrome, hypercortisolism  
430 consistent with elevation of cholesterol levels, and hepatocellular cancer pathways. Notably, claudins,  
431 which were largely downregulated in the intestine where they are commonly expressed within tight  
432 junctions, were upregulated in liver tissue after 56 days of spaceflight (Supplementary File 5), including  
433 highly significant and high relative abundance increases in *CLDN1* and *CLDN2*. So-called non-tight junction  
434 claudins have only recently been experimentally explored and, in hepatic cells, *CLDN1* is implicated in  
435 hepatocellular carcinoma (HCC)<sup>144</sup>. More broadly, significant upregulation of *Tgf- $\alpha$*  and genes involved in  
436 complex Tgf- $\beta$  signalling (*Tgfb2*, *Tgfb3*, *Tab2*, *Tgfbrap*, *Smad3*), alongside other markers (*Dapk2*, *Vegfa*,  
437 *Dvl3*)<sup>145,146</sup> are associated to HCC, as well as immune suppression through the cyclin-dependent kinase  
438 inhibitor 1A (*p21<sup>cip1</sup>*; *Cdkn1a*)<sup>147</sup>, also significantly upregulated after 29 and 56 days of spaceflight. Previous  
439 gene expression analysis of mice exposed to high-energy ion particle radiation to simulate exposure to  
440 Galactic Cosmic Rays reported induction of spontaneous HCC<sup>146</sup>. These prominent transcriptomic shifts  
441 after 56 days of spaceflight, if reflected in longer term studies in humans, could represent a serious health  
442 concern.

## 443 2.5 Conclusions

444 Through metagenomic assessment of the murine gut microbiome, significant spaceflight-associated  
445 changes in bacteria linked to bile and fatty acid metabolism were identified. These changes in relative  
446 abundance were largely consistent in two groups of mice after spaceflight when compared to different on-  
447 Earth control groups at different timepoints as well as when using distinct metagenomic methodologies.  
448 The microbiome changes coincided with substantial changes to gene expression at the host-gut  
449 microbiome interface which are critical to barrier function, microbe interactions and bile acid transport in  
450 the intestine. These interactions suggest disruption of the signals, metabolites, and immune factors  
451 exchanged across the gut-liver axis which are likely to drive glucose and lipid dysregulation. Collectively,  
452 these multiomic findings suggest host-gut microbiome interactions during spaceflight are likely to underly  
453 widespread changes to host physiology which could pose a risk to health.

## 454 3 Funding

455 NB would like to acknowledge support from the University College Dublin Ad Astra program. Genelab is  
456 funded by the Space Biology Program (Science Mission Directorate, Biological and Physical Sciences  
457 Division) of the National Aeronautics and Space Administration. Open access was funded by University  
458 College Dublin.

## 459 4 Acknowledgements

460 This research was generated by the NASA GeneLab Analysis Working Group for Microbes. The team would  
461 like to acknowledge the GeneLab for School (GL4S) team for supporting young scientists.

## 462 5 Supplementary Files

463 Supplementary document 1 – includes study limitations and future perspectives, and additional  
464 supplementary figures detailing mouse carcass weights, extended amplicon processing statistics,  
465 metagenomics processing statistics and host differential expression pathway maps.

466 Supplementary file 1 – RR6 amplicon-based metagenomics

467 Supplementary file 2 – RR6 WMS processing summary

468 Supplementary file 3 – RR6 WMS-based taxonomy

469 Supplementary file 4 – RR6 WMS-based function

470 Supplementary file 5 – RR6 host transcriptomics

## 471 6 Methods

### 472 6.1 Experimental design

473 Thirty-two 32-weeks-old female C57BL/6NTac mice were split into four treatment groups: flight ISS  
474 (FLT\_ISS, n=7), ground control for ISS (GC\_ISS, n=9), flight live animal return (FLT\_LAR, n=9) and ground  
475 control for live animal return (GC\_LAR, n=7) (Fig 1A). FLT\_ISS and FLT\_LAR mice were launched on SpaceX-  
476 13 and transferred to the rodent research habitat on the ISS whereas their matched ground controls,  
477 GC\_ISS and GC\_LAR, were kept in identical rodent habitats at the Kennedy Space Centre. Diet (LabDiet  
478 Rodent 5001) and deionized autoclaved water were provided *ad libitum*, and a 12:12 hr dark/light cycle  
479 maintained. After 29 days of flight onboard the ISS, FLT\_LAR mice were returned to earth as part of the Live  
480 Animal Return and sacrificed alongside GC\_LAR using common processing at ages of 41 weeks old. FLT\_ISS  
481 mice were sacrificed after 53-56 days of flight onboard the ISS at the same time as GC\_ISS mice at the  
482 Kennedy Space Centre at 44 weeks old using a common timeline and methodology.

483 During this period in the Destiny module (US laboratory) on the ISS, the mice were exposed to an average  
484 daily 165.8  $\mu\text{Gy d}^{-1}$  Galactic Cosmic Ray (GCR) dose and 117.3  $\mu\text{Gy d}^{-1}$  South Atlantic Anomaly (energetic  
485 protons) dose (data provided by Ames Life Sciences Data Archive - ALSDA). This is in line with standard  
486 range of exposure on the ISS<sup>148</sup>, and represents around a 100% increase to common exposure on earth. The  
487 temperature, relative humidity and elevated carbon dioxide levels on the ISS were mimicked in the ground  
488 control rodent habitats at the Kennedy Space over the 56 days of spaceflight, so were not significantly  
489 different (t-test,  $p > 0.05$ ) between flight and ground controls, and averaged 22.75 ( $\pm 0.35$ ) °C, 41.49 ( $\pm 2.28$ )  
490 % and 3,219 ( $\pm 340$ ) CO<sub>2</sub> ppm, respectively.

### 491 6.2 Murine colon and liver RNA, and intestinal metagenomic DNA sampling and sequencing

#### 492 6.2.1 DNA extraction

493 DNA was extracted using the Maxwell RSC Purefood GMO and Authentication Kit (Promega, Madison, WI)  
494 ([OSD-249](#)). Half of a frozen faecal pellet was placed into a tube with 940  $\mu\text{L}$  CTAB solution and homogenized  
495 using tissue homogenizing bead mix (Navy RINO Lysis, Next Advance) on Bullet Blender Gold 24 (Next  
496 Advance) for 4 minutes at 4°C. Homogenates were centrifuged for 3 minutes at 10°C and 21,000 g to  
497 deflate foam. The supernatant from each sample was then used to isolate and purify DNA following the  
498 manufacturer's protocol. DNA was eluted in 105  $\mu\text{L}$  RNase free H<sub>2</sub>O and was further cleaned using OneStep  
499 PCR Inhibitor Removal Kit (Zymo Research). Concentrations for all DNA samples were measured using Qubit  
500 3.0 Fluorometer (Thermo Fisher Scientific, Waltham, MA) with a Qubit DNA HS kit. DNA quality and size  
501 were assessed using an Agilent 4200 TapeStation with a gDNA ScreenTape Kit (Agilent Technologies, Santa  
502 Clara, CA).

#### 503 6.2.2 16S rRNA gene amplification

504 DNA library preparation was performed by the Genome Research Core (GRC) at the University of Illinois at  
505 Chicago. 10 ng of genomic DNA was used as input to a two-stage PCR amplification protocol<sup>149,150</sup>. In the  
506 first stage, primers 515F/806R (Earth Microbiome Project) containing Fluidigm 'Common Sequence' linkers  
507 (CS1 and CS2) were used to amplify gDNA. In the second stage, Fluidigm AccessArray barcoded primers  
508 were used to amplify PCR products from the first stage and incorporate Illumina sequencing adapters and a  
509 sample barcode. Sequencing was performed on an Illumina MiniSeq mid-output flow cell, employing  
510 paired-end 2x153 base reads.

### 511 6.2.3 Whole metagenome sequencing

512 Whole metagenome sequence libraries were prepared using an Illumina Nextera DNA Flex Library Prep kit  
513 (Illumina, San Diego, CA) according to the manufacturer's instructions. Input DNA was approximately 100  
514 ng per reaction, and five cycles of PCR were performed. Index adapters used were IDT for Illumina, 96-well  
515 Nextera Flex Dual Index Adapters, set A. Library fragment sizes (approximately 550 bp) were assessed using  
516 an Agilent 4200 TapeStation with D1000 DNA ScreenTapes (Agilent Technologies, Santa Clara, CA). Pooled  
517 library concentration was measured with a KAPA Library quantification kit (Roche, Wilmington, MA). Library  
518 quality control was performed on an Illumina iSeq100 sequencer (Illumina, San Diego, CA). Whole  
519 metagenome shotgun sequencing was performed on an Illumina NovaSeq6000 instrument with a 500-cycle  
520 SP flow cell. Library preparation and sequencing were performed by the GeneLab Sample Processing Lab  
521 (NASA Ames Research Center).

### 522 6.2.4 RNA extraction and sequencing

523 RNA was extracted from mouse tissue samples using an AllPrep DNA/RNA Mini Kit (Qiagen, Valencia, CA).  
524 Homogenization buffer for RNA purification was made by adding 1:100 beta-mercaptoethanol to Buffer RLT  
525 (Qiagen, Valencia, CA) and kept on ice until use. Approximately 30 mg of frozen colon ([OSD-247](#)) or liver  
526 ([OSD-245](#)) tissue was isolated using a scalpel, weighed and immediately placed in 600  $\mu$ L of the Buffer RLT  
527 solution. Homogenization was performed using tissue homogenizing bead mix (Zirconium Oxide 2.0mm  
528 Beads, Next Advance) on Bullet Blender Gold 24 (Next Advance) for 5 minutes at 4°C. Homogenates were  
529 centrifuged for 3 minutes at RT and 14,000 g to remove cell debris. The supernatant from each sample was  
530 then used to isolate and purify RNA following the manufacturer's protocol. RNA was eluted in 50  $\mu$ L RNase  
531 free H<sub>2</sub>O. Concentrations for all RNA samples were measured using a Qubit 3.0 Fluorometer (Thermo Fisher  
532 Scientific, Waltham, MA). RNA quality was assessed using an Agilent 2100 Bioanalyzer with an RNA 6000  
533 Nano Kit or RNA 6000 Pico Kit (Agilent Technologies, Santa Clara, CA). ERCC ExFold RNA Spike-In Mixes  
534 (Thermo Fisher Scientific, Waltham, MA Cat 4456739, v92) at 1:100 dilution of either Mix 1 or Mix 2 were  
535 added on the day of library prep at the concentrations suggested by the manufacturer's protocol.

536 Ribosomal RNA depletion was performed using an Illumina TruSeq Stranded Total RNA Library Prep Gold  
537 kit. Input RNA amounts were approximately 500 ng; RNA RIN values were >4. Index adapters were 1.5  $\mu$ M  
538 (IDT, 384-well xGen Dual Index UMI Adapters). 15 cycles of PCR were performed. Library fragment sizes  
539 (approximately 300 bp) were assessed using an Agilent 4200 TapeStation with a D1000 DNA ScreenTape  
540 (Agilent Technologies, Santa Clara, CA). Pooled library concentration was measured by Universal qPCR  
541 Master Mix (Kapa Biosystems, Wilmington, MA). Library quality control was performed on an Illumina  
542 iSeq100 sequencer (Illumina, San Diego, CA). Whole metagenome sequencing was performed on an  
543 Illumina NovaSeq6000 instrument with a 500-cycle SP flow cell. Library preparation and sequencing were  
544 performed by the GeneLab Sample Processing Lab (NASA Ames Research Center).

## 545 6.3 Bioinformatics

### 546 6.3.1 16S rRNA gene barcoding

547 Amplicon sequence reads were processed and annotated using Anchor<sup>28,35,139,151,152</sup>. Exact sequence  
548 variants (ESV) were identified in place of operational taxonomic units (OTUs)<sup>153,154</sup>. Sequences were aligned  
549 and dereplicated using Mothur<sup>155</sup> and a count threshold parameter of 96. Annotation at family, genus or  
550 species-level used BLASTn criteria of >99% identity and coverage to the NCBI 16S curated and NCBI nr/nt  
551 databases (January 2022 versions). Differentially abundant ESVs were manually assessed for quality. When  
552 the highest identity/coverage was shared amongst multiple different references, all annotations were  
553 retained and reported.

554 Differential abundance analysis was performed using DESeq2<sup>156,157</sup>, which performs well with sparse data  
555 and uneven library sizes<sup>158</sup>. Sparsity and count thresholds were applied whereby an ESV count in a single  
556 sample was required to be <90% of the count in all samples, and ESV counts were required to be >0 in at  
557 least 3 samples from the same group<sup>35</sup>. A false discovery rate (FDR; Benjamini-Hochberg procedure) <0.1  
558 correction was applied<sup>159</sup>.

### 559 6.3.2 Whole metagenome sequencing co-assembly and annotation

560 Quality control used Trim Galore! (v0.6.6)<sup>160</sup>, a wrapper script to automate quality and adapter trimming as  
561 well as quality control. Trim Galore is based on cutadapt (v2.10)<sup>161</sup> and fastqc (v0.11.5)<sup>162</sup>. Trim Galore!  
562 PARAMETERS : --trim-n --max\_n 0 --paired --retain\_unpaired --phred33 --length 75 -q 5 --stringency 1 -e 0.1  
563 -j 1. BBMAP<sup>163</sup> was used to remove potential contamination from human using the masked version of hg19  
564 human assembly. To remove redundancy in read dataset and reduce the computational load, reads were  
565 normalized using ORNA<sup>164</sup> with the following parameters: -sorting 1 -base 1.7 -kmer 21.

566 MEGAHIT v1.2.9<sup>165</sup> was used to assemble reads from all samples into one co-assembly using *meta-large*  
567 option. Kallisto (v0.46.2)<sup>166</sup> expectation maximization algorithm was used to complete metagenomics read  
568 assignment and infer contig abundance<sup>167</sup>. Prodigal (v2.6.3)<sup>168</sup> was used with the option *meta* to predict  
569 open reading frames (ORFs) and BLAST v2.3.0<sup>169</sup> was used to annotate contigs sequence.

570 To assign contig taxonomy, a first alignment iteration was run using full contig lengths against the NCBI  
571 nr/nt database (January 2022) and Reference Viral Database (RVDB v v25.0). To further resolve nucleotide  
572 taxonomic annotation, a second alignment was run against all databases which included selected genomes  
573 (additional 1148 sequences) from NCBI refseq informed by first iteration. BLASTn was run using the  
574 following parameters: -evalue 1e-50 -word\_size 128 -perc\_identity 97. Contig alignment scores were  
575 compared between the three databases and the best bitscore was selected as the best alignment for a  
576 given contig. Descriptive statistics were also provided for contigs with a common species annotation that  
577 had an average alignment identity >97%, total alignment length > 2000nt and an average query coverage  
578 >20%. To validate ESV sequences using the metagenomics *de novo* assembly, ESVs were aligned to WMS  
579 contigs using BLASTn.

580 To annotate genes, three protein databases (NCBI nr, UniProtKB Swiss-Prot, and TrEMBL; January 2022)  
581 were searched using the translated sequences of the predicted proteins. BLASTx was run with the following  
582 parameters: -evalue 1e-10 -word\_size 6 -threshold 21. Alignment scores were compared between the three  
583 databases and the best bitscore was selected as the best alignment for a given orf. GO, pfam, PANTHER,  
584 EMBL, InterPro, HAMAP, TIGRFAMs, STRING, HOGENOM, SUPFAM terms were mined from UniProtKB  
585 database. Amino acid sequences were used as input in the GhostKOALA webserver<sup>170</sup> to add functional  
586 genes and pathways information. KEGG functional and taxonomic annotation was retrieved using complete  
587 and incomplete pathways. *Extibacter muris* strain DSM28560 bile acid-inducible operon sequence  
588 (baiBCDEFGHI)<sup>62</sup>, from were manually added to default KEGG database. One bai sequence did not have a  
589 KEGG term associated to it (baiG MFS transporter; bile acid transporter) and a temporary KEGG term was  
590 assigned to it (K9999).

### 591 6.3.3 Metagenome assembled genomes (MAGs)

592 Using metagenome co-assembly from 3.4.2, genome binning was performed using MetaBAT2<sup>171</sup>. Genome  
593 quality estimation of all bins was performed using CheckM (version v1.1.6)<sup>172</sup>. Taxonomic classification was  
594 performed with Bin Annotation Tool (BAT) a pipeline for the taxonomic classification of metagenome  
595 assembled genomes<sup>173</sup>.

### 596 6.3.4 Murine transcriptome reference mapping

597 Mouse liver and colon RNA-Seq reads were processed and assembled following NASA GeneLab consensus  
598 pipeline, as described previously<sup>174</sup>.

## 599 7 Statistical Analysis

### 600 7.1 Alpha and beta diversity

601 To estimate and compare microbial richness within samples, alpha diversity was measured using diversity  
602 indices using Phyloseq R library<sup>175</sup> and was compared between groups with t-tests (parametric) or Mann-  
603 Whitney U (non-parametric) tests. Unsupervised multivariate analysis (ordination) was performed using  
604 Principal Coordinate Analysis (PCoA) with normalized counts (Supplementary file) while constrained  
605 ordination was based on distance-based Canonical Correspondence Analysis (CCA). Significance of  
606 constraints were assessed using ANOVA-like permutation testing for CCA (anova.cca). Vegan R library<sup>176</sup>  
607 was used to conduct these analyses, statistics, and to produce graphs and draw dispersion ellipses. As an

608 exploratory visualization of annotated WMS contigs, Uniform Manifold Approximation and Projection  
609 (UMAP) was used to reduce the dimensionality of beta diversity WMS contig count matrices. CPM  
610 normalized counts of differentially abundant species (30 in each comparison) were selected as input and  
611 umap function from the umap R package (v 0.2.10) was used for each comparison with default parameters.

## 612 7.2 Differential abundance/expression analysis

613 Prior to differential abundance analysis, sparsity and count thresholds were applied whereby an  
614 ESV/contig/transcript count in a single sample must be <90% of the count across all samples and ESV/contig  
615 occurrence must be at least  $\geq 3$  in samples within the same design factor.

616 Differential abundance (or expression) analysis was performed using DESeq2<sup>177</sup> based on pre-processed  
617 raw abundance of ESVs/contigs/ORFs/transcripts. A false discovery rate (FDR; Benjamini-Hochberg  
618 procedure) < 0.1 was applied for statistical significance<sup>156</sup>. Missingness is a known challenge for negative  
619 binomial regression models (such as used in DESeq2) when analyzing zero-inflated abundance tables<sup>178,179</sup>,  
620 contigs with an absolute zero across all replicated samples belonging to a same factor were assumed to be  
621 structural zeros and flagged as significantly differentially abundant. To address conservative p-value  
622 distribution<sup>180</sup> of RNA-Seq differential expression analysis, local FDR values were computed from DESeq2 *p*-  
623 values using fdrtool (v1.2.17)<sup>181</sup> R library.

## 624 7.3 Functional enrichment analysis

625 Ghostkoala output was organized into a gene count table using WMS ORF raw count table and used as  
626 input for over-representation analysis (ORA) of WMS data. ORA was used to statistically test the overlap  
627 between DA ORFs (FDR < 0.1) and a geneset using pathways of interest (Supplementary file 4). *p*-values  
628 were calculated using a hypergeometric test using clusterProfiler (v4.7.1.003) R library<sup>182</sup>.

629 Gene-set enrichment analysis (GSEA) of RNASeq data was performed on the Webgestalt<sup>183</sup> platform using  
630 the entire gene list, rank-ordered combining significance and effect size from DESeq2 differential  
631 expression analysis, i.e.  $\log_2(\text{FC}) \cdot -\log(\text{pValue})$ <sup>184</sup>. Gene symbols were inferred from assembly transcripts  
632 using org.Mm.eg.db (v3.16)<sup>185</sup> R annotation library.

633

634

635 Figures

636 Figure 1

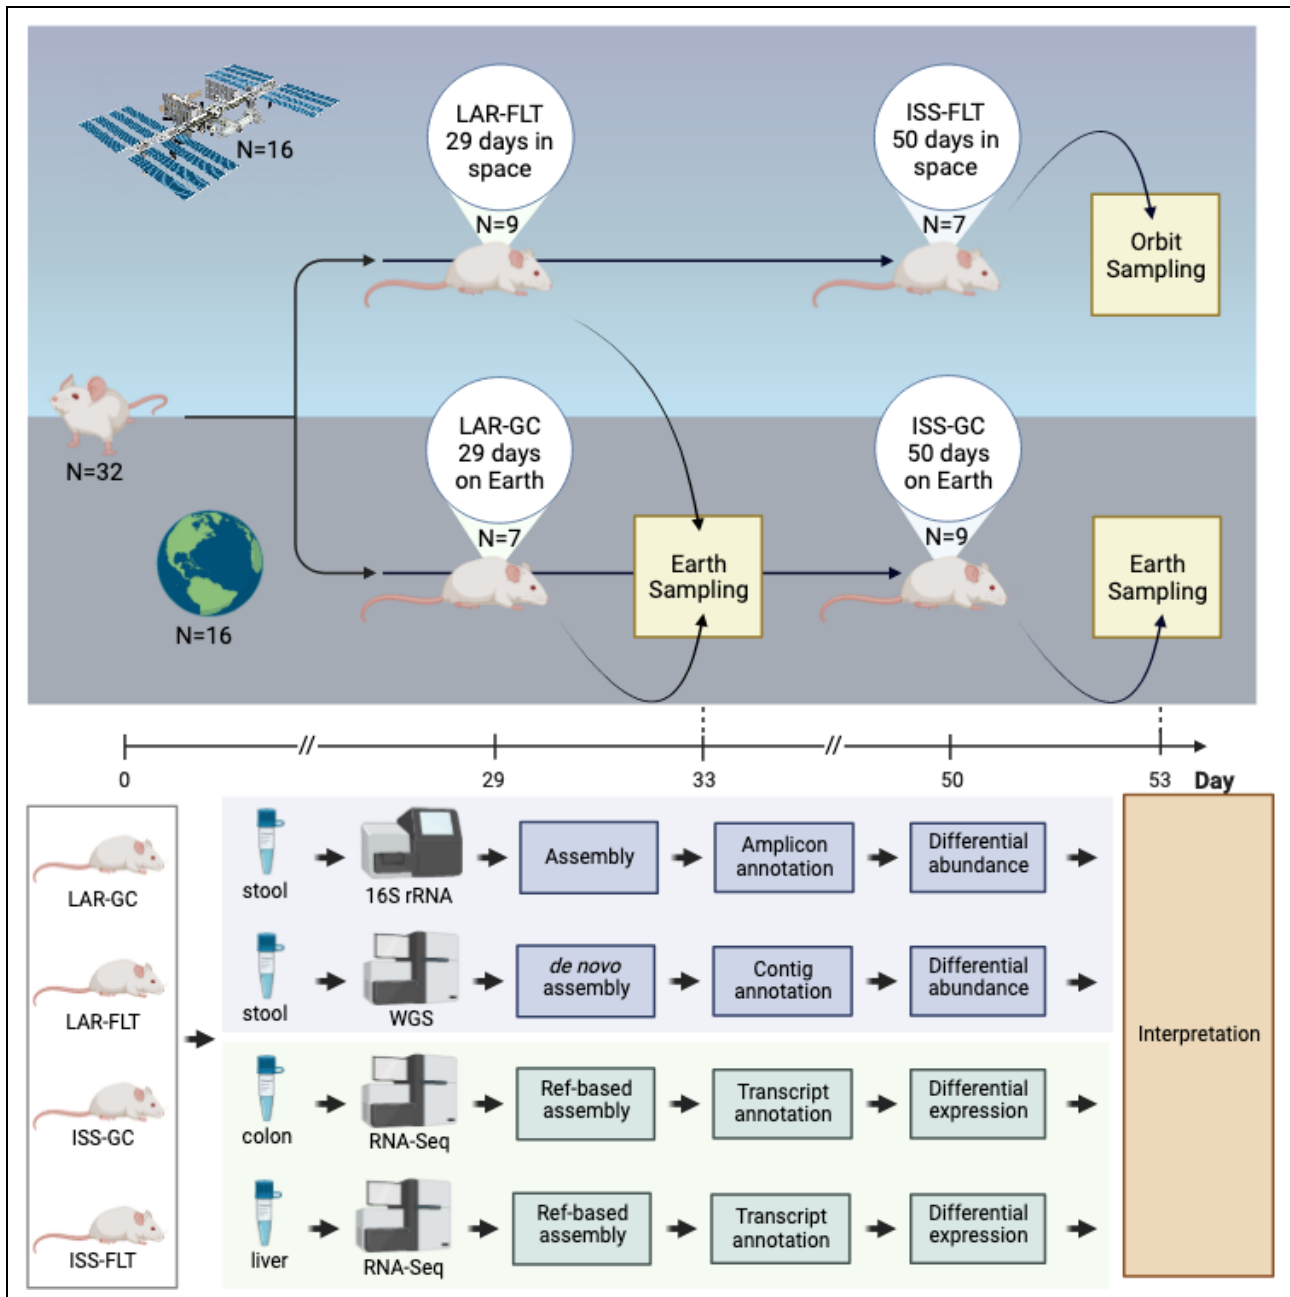

Figure 1 Experimental design

Analysis design of data from the Rodent Research 6 mission and multiomic data analysis strategy

637

638

639

640

641

642

643

644

645

646 Figure 2

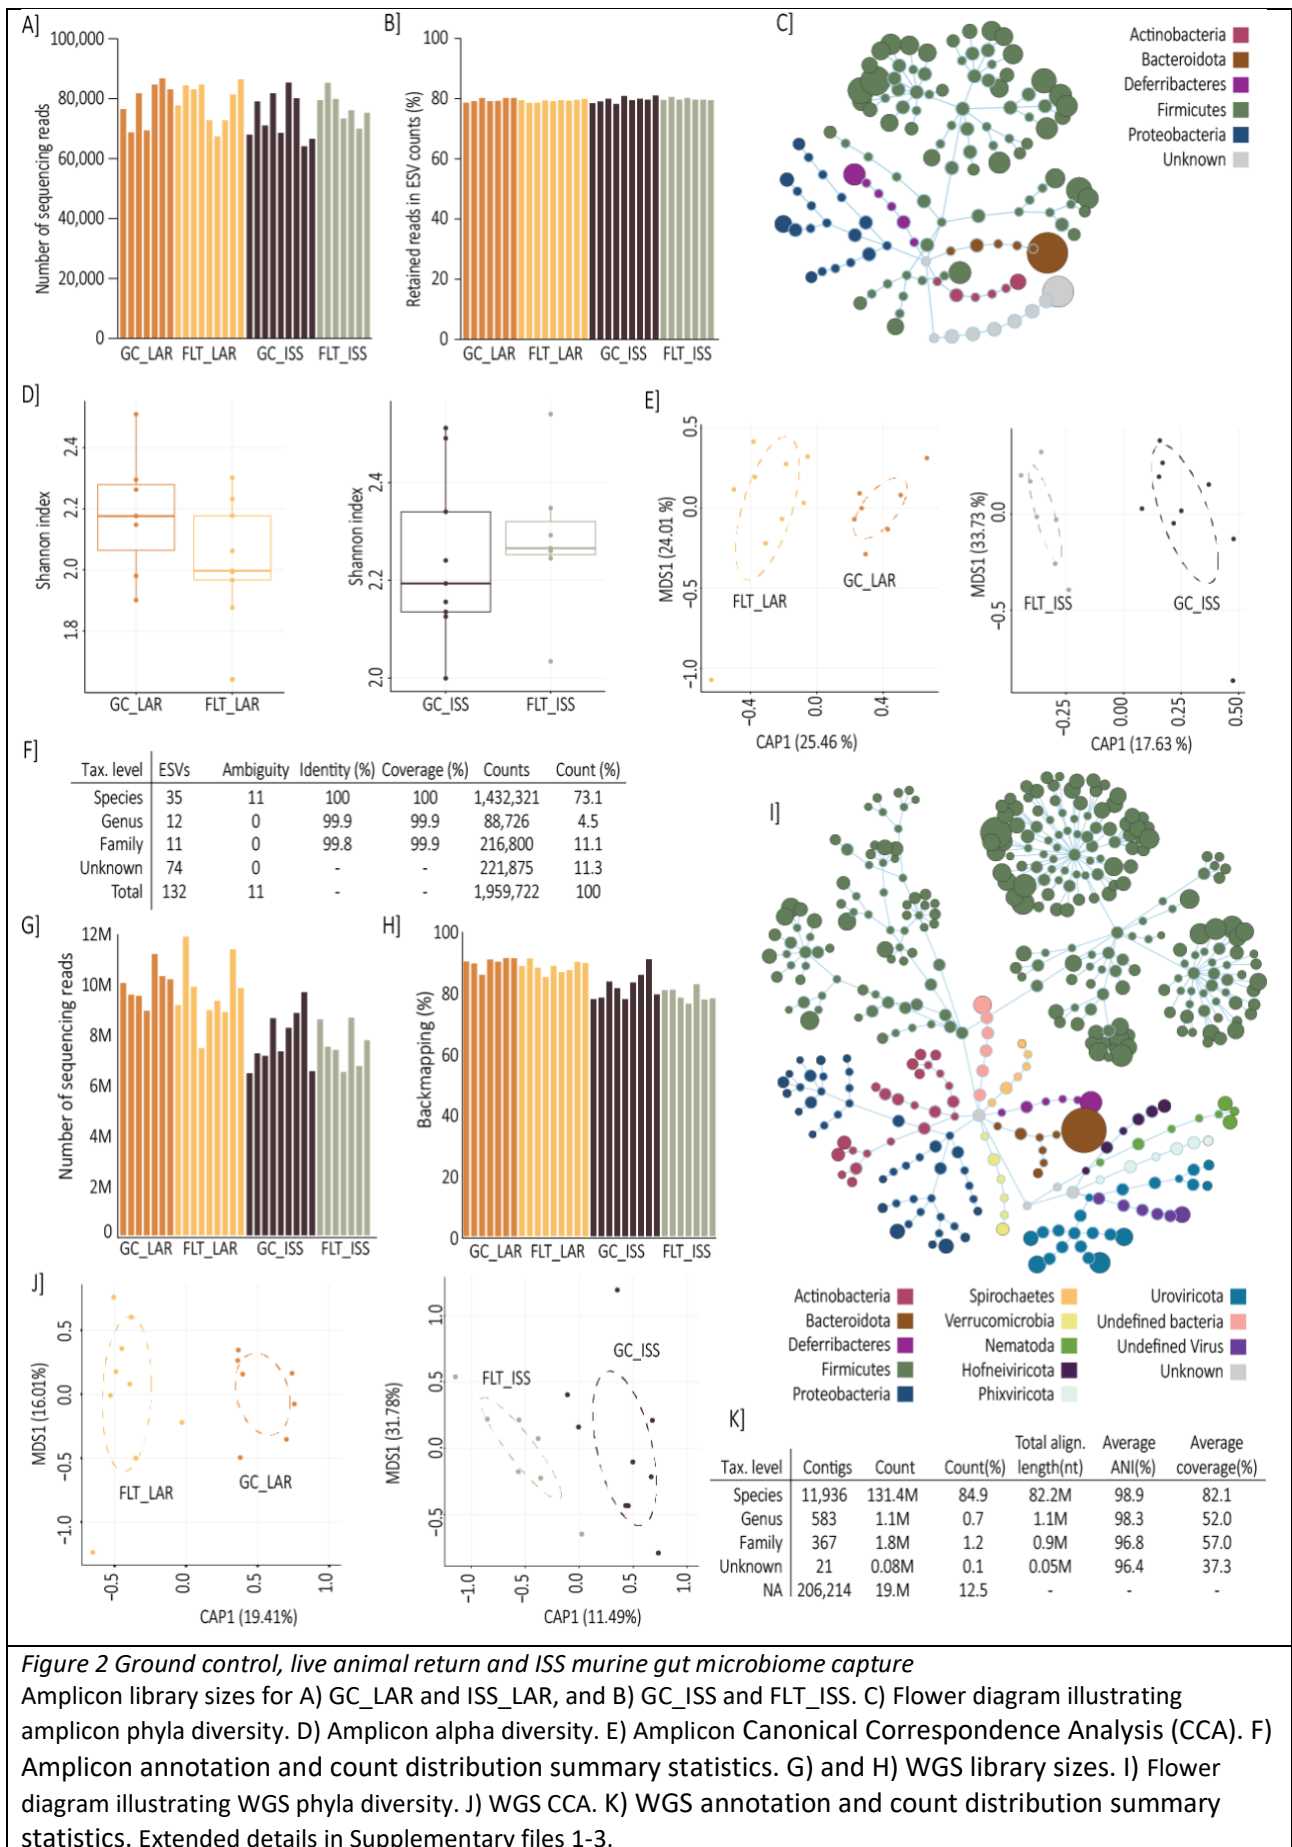

**Figure 2** Ground control, live animal return and ISS murine gut microbiome capture

Amplicon library sizes for A) GC\_LAR and ISS\_LAR, and B) GC\_ISS and FLT\_ISS. C) Flower diagram illustrating amplicon phyla diversity. D) Amplicon alpha diversity. E) Amplicon Canonical Correspondence Analysis (CCA). F) Amplicon annotation and count distribution summary statistics. G) and H) WGS library sizes. I) Flower diagram illustrating WGS phyla diversity. J) WGS CCA. K) WGS annotation and count distribution summary statistics. Extended details in Supplementary files 1-3.

648 Figure 3

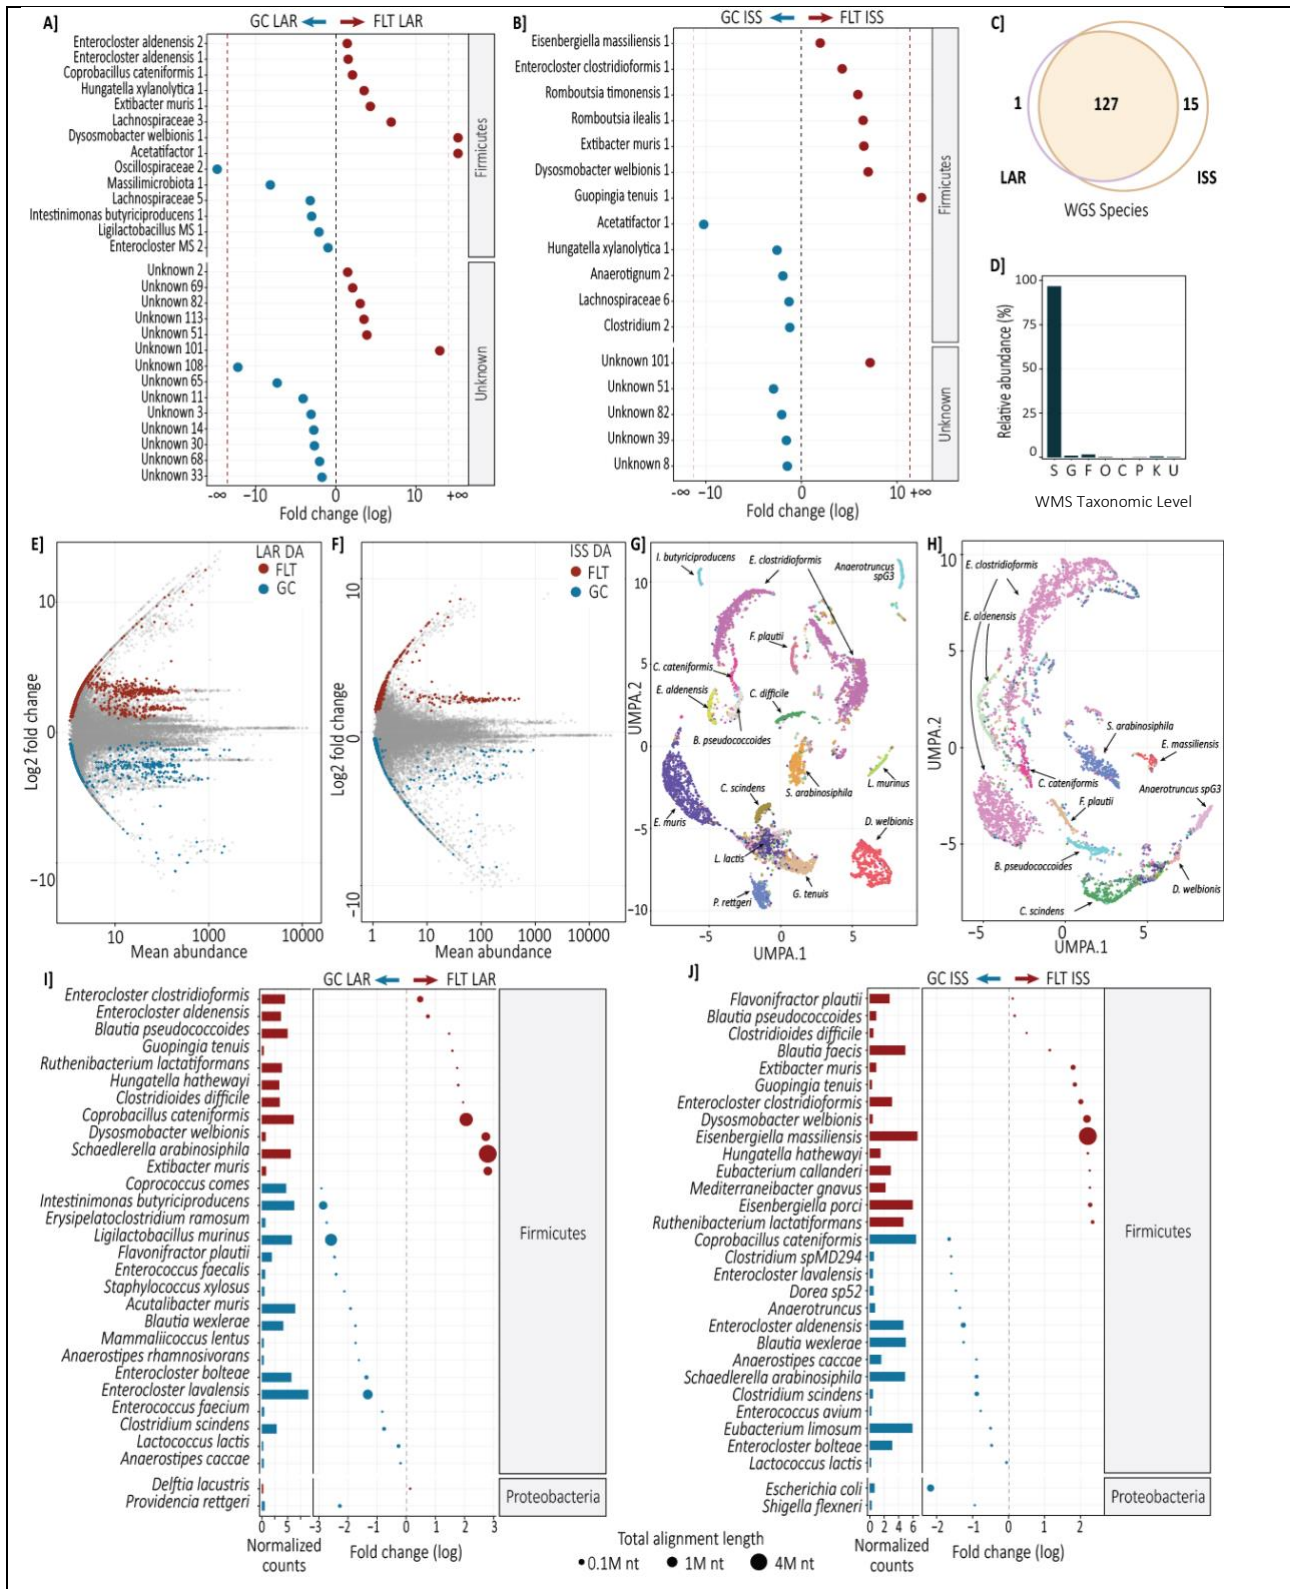

**Figure 3 Spaceflight-associated significant microbiome alterations**

Significantly differentially abundant (DESeq2) ESVs between A) GC\_LAR and ISS\_LAR, and B) GC\_ISS and FLT\_ISS. Fold change (FC log<sub>2</sub>) in relative abundance.  $\pm \infty$  (demarcated by the dashed red line) indicates 'infinite' fold change, where an ESV had detectable counts in samples from only one condition (structural zero). C) Comparison of WGS detected species between LAR and ISS samples. D) Distribution of counts across WGS taxonomy. E) and F) Contig WMS MA plots with significantly differentially abundant (DESeq2) highlighted. G) and H) UMAP diagrams used to visualise contig clustering of selected species and J) Significantly differentially abundant (DESeq2) species detected with WGS, node size illustrates contig number. Extended details in Supplementary files 1-3.



Amplicon sequencing: Species enriched in FLT\_LAR mice compared to controls included *Coprobacillus cateniformis*, *Dysosmobacter welbionis*, *Enterocloster aldenensis*, *Extibacter muris* and *Hungatella xyloanalytica*, while depleted species included *Intestinimonas butyriciproducens* and ESVs ambiguous to multiple *Enterocloster* species (including *E.lavalensis*) and *Ligilactobacillus* species (including *L.murinus*). Species enriched in FLT\_ISS mice included *D.welbionis*, *Eisenbergiella massiliensis*, *Enterocloster clostridioformis*, *E.muris*, *Guopingia tenuis*, *Romboutsia ilealis* and *Romboutsia timonensis*, while depleted species included *H.xyloanalytica*.

WMS: Microbiome species significantly enriched in after 29 days of spaceflight comprised 11 Firmicutes, including *Blautia pseudococcoides*, *Clostridioides difficile*, *C.cateniformis*, *D.welbionis*, *E.aldenensis*, *E.clostridioformis*, *E.muris*, *G.tenuis*, *Hungatella hathewayi*, *Ruthenibacterium lactatiformans*, *Schaedlerella arabinosiphila* and the proteobacteria *Delftia lacustris*. Significantly depleted species included 18 firmicutes, including *Acutalibacter muris*, *Anaerostipes caccae*, *Blautia wexlerae*, *Clostridium scindens*, *Enterococcus faecalis*, *Ligilactobacillus murinus*, *Enterocloster bolteae*, *E.lavalensis*, *Flavonifractor plautii*, *I.butyriciproducens*, *Lactococcus lactis* and *Staphylococcus xylosus*, and the Proteobacteria *Providencia rettgeri*. These findings agreed with significant differential abundance of *C.cateniformis*, *D.welbionis*, *E.aldenensis*, *E.clostridioformis*, *E.muris* and *I.butyriciproducens* inferred from 16S rRNA amplicon analysis and resolved species ambiguity for *E.bolteae*, *E.lavalensis* and *L.murinus*. Microbiome species which were significantly enriched in after 56 days of spaceflight comprised 14 Firmicutes, including *B.pseudococcoides*, *C.difficile*, *D.welbionis*, *E.clostridioformis*, *Eisenbergiella massiliensis*, *E.muris*, *F.plautii*, *G.tenuis*, *H.hathewayi* and *R.lactatiformans*. Significantly depleted species included 17 Firmicutes, including *A.muris*, *Anaerostipes caccae*, *B.wexlerae*, *C.scindens*, *C.cateniformis*, *E.aldenensis*, *E.bolteae*, *E.lavalensis*, *L.lactis*, *S.arabinosiphila* and as well as the Proteobacteria *Escherichia coli* and *Shigella flexneri*.

650 Figure 4

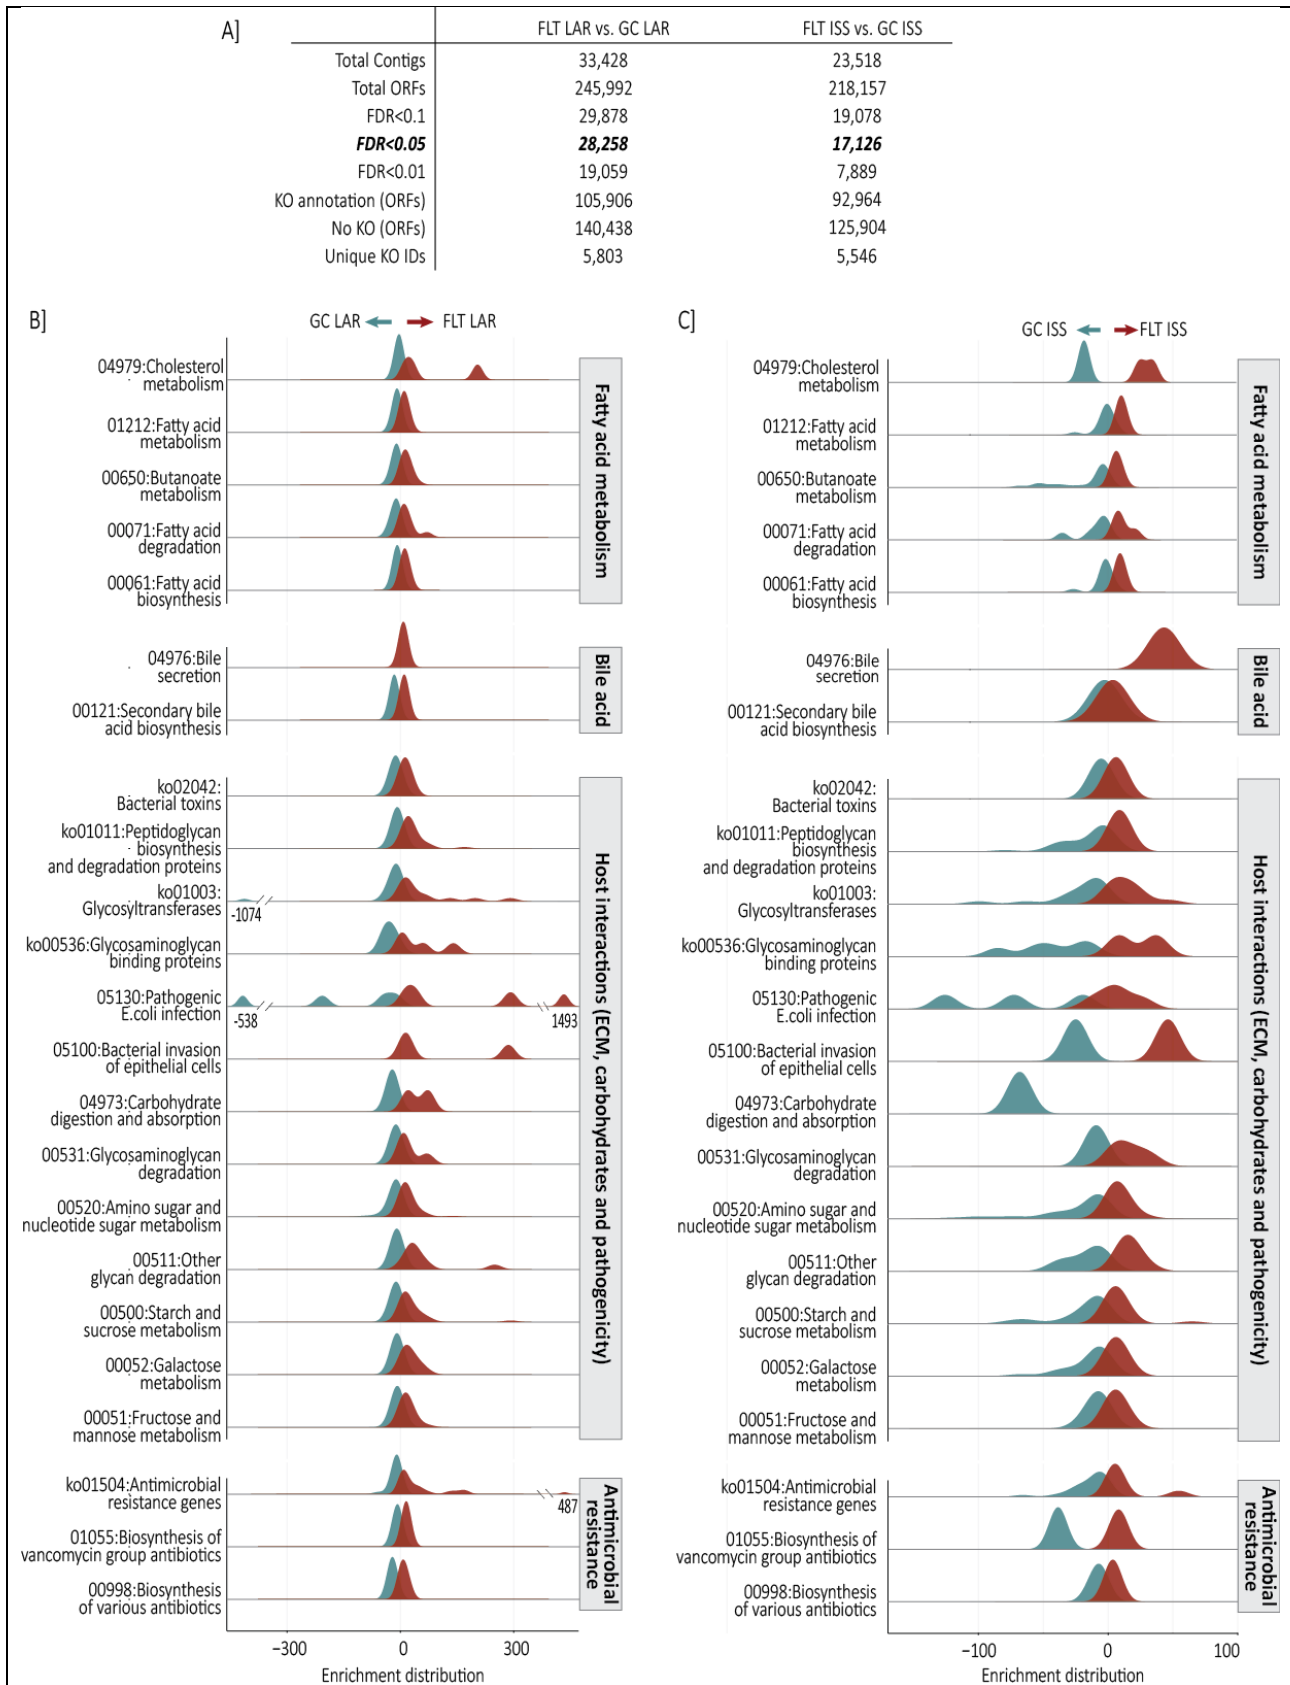

metabolism was reflected in Bile secretion (04976) and Cholesterol metabolism (04979) and Secondary bile acid biosynthesis pathways, including bile salt hydrolase (*cbh*, EC:3.5.1.24) and 3-oxocholoyl-CoA 4-desaturase (*baiCD*, EC:1.3.1.115). Over-representation of the antimicrobial resistance was represented in Brite ontology Antimicrobial resistance genes (ko01504) and the pathways for beta-Lactam resistance (01501), Biosynthesis of various antibiotics (00998) and Biosynthesis of vancomycin group antibiotics (01055). The Brite ontology Bacterial toxins (ko02042) was over-represented, including tight junction interacting zona occludens toxin (K10954), as well as the pathways Pathogenic *Escherichia coli* infection (05130) and Bacterial invasion of epithelial cells (05100). Diverse carbohydrate metabolism and ECM interacting pathways were represented by Galactose metabolism (00052), Mannose type O-glycan biosynthesis (00515), Glycosaminoglycan degradation (00531), Other glycan degradation (00511), ECM-receptor interaction (04512) as well as the Brite ontology of Glycosaminoglycan binding proteins (ko00536), Peptidoglycan biosynthesis and degradation proteins (ko01011) and Glycosyltransferases (ko01003). These included putative Mucin-associated glycosyl hydrolases (GHs)<sup>186</sup>, GH2s:  $\beta$ -galactosidase (EC:3.2.1.23),  $\beta$ -mannosidase (EC:3.2.1.25),  $\beta$ -glucuronidase (EC:3.2.1.31),  $\alpha$ -l-arabinofuranosidase (EC:3.2.1.55),  $\beta$ -xylosidase (EC:3.2.1.37),  $\beta$ -glucosidase (EC:3.2.1.21), GH20:  $\beta$ -hexosaminidase (EC:3.2.1.52), GH29:  $\alpha$ -l-fucosidase (EC:3.2.1.51), and GH84: N-acetyl  $\beta$ -glucosaminidase (EC:3.2.1.52).

651 Figure 5

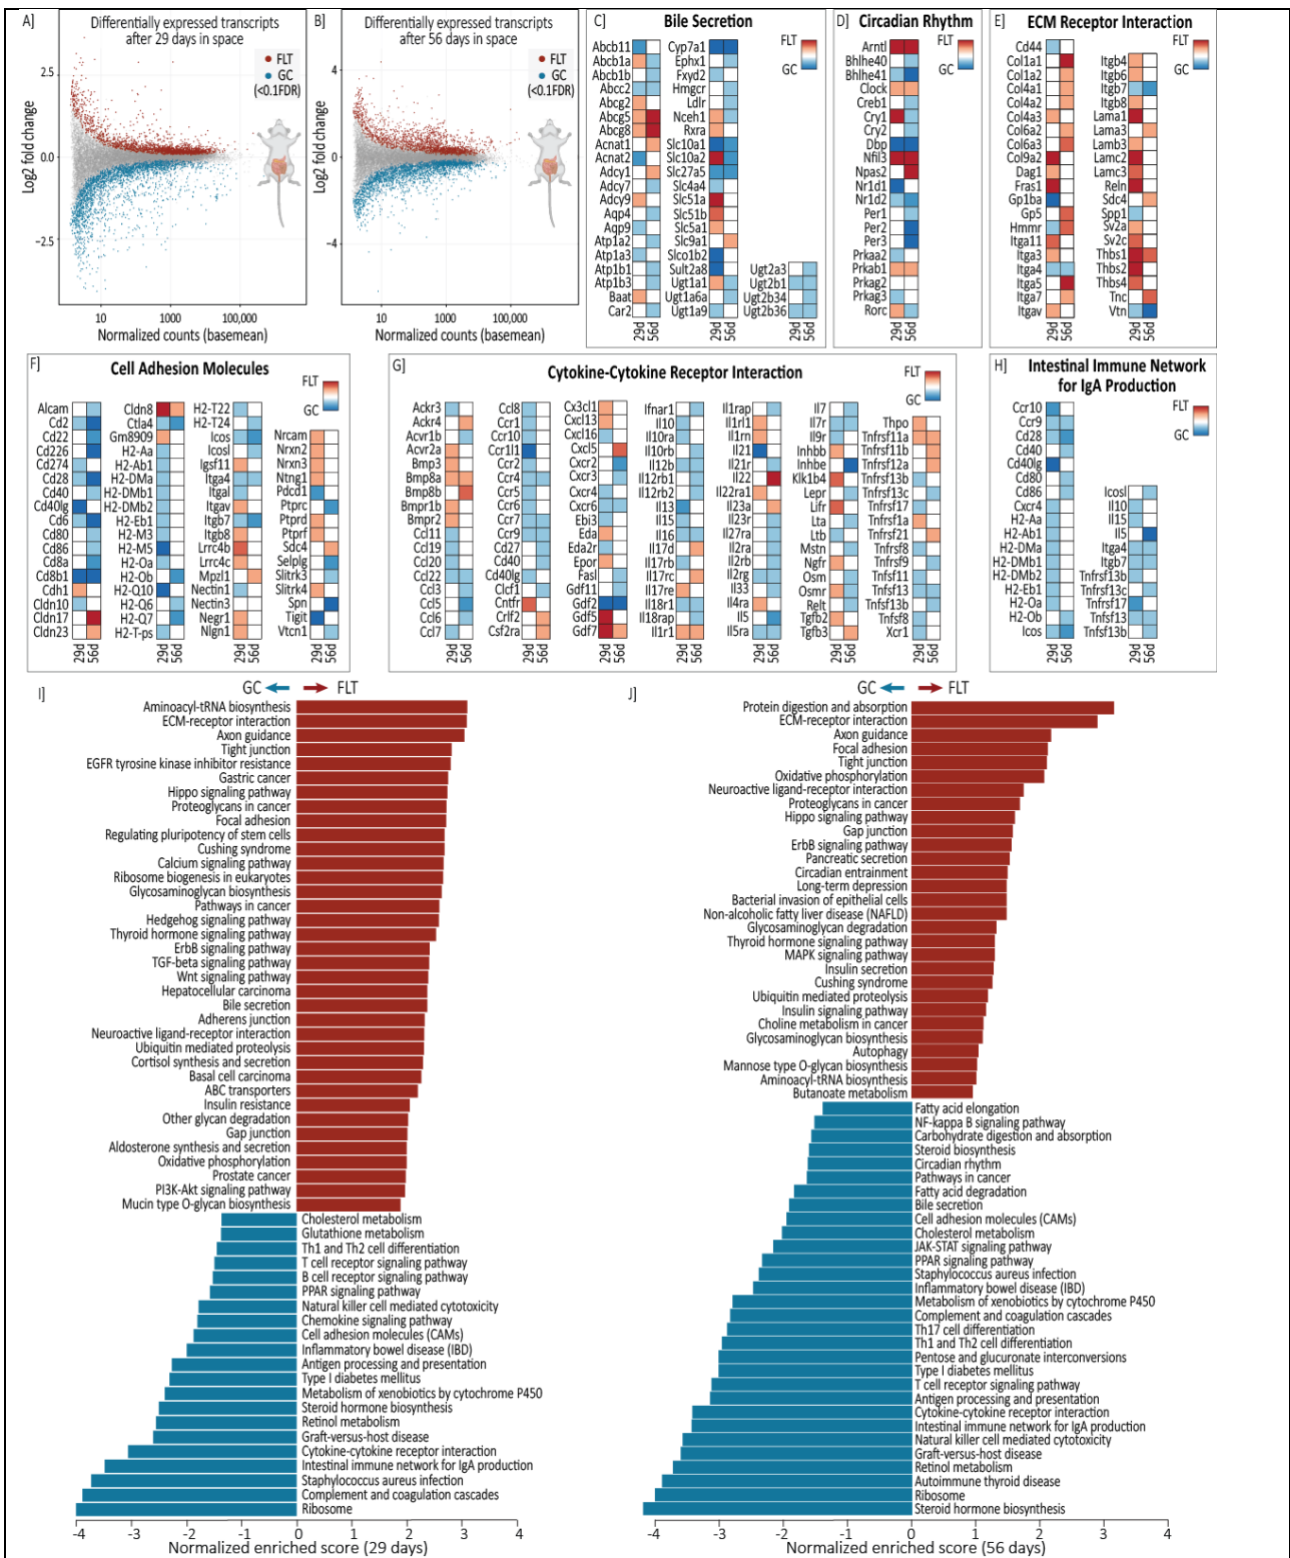

**Figure 5** Microbiome-host interface: spacelflight alters colon gene expression

MA plots showing A) GC\_LAR vs FLT\_LAR (29 days of spaceflight) and B) GC\_ISS vs FLT\_ISS (56 days of spaceflight) differentially expressed genes in the colon (FDR < 0.1). Differentially expressed gene from select KEGG pathways of interest, I) Significant Gene Set Enrichment Analysis (GSEA) 29 days (modified from WebGestalt<sup>187</sup>) and J) Significant GSEA 56 days spaceflight. Full DE gene list is available in Supplementary File 5 and select KEGG pathways of interest with differentially expressed gene highlighted are available in Supplementary document 1.

Gene set enrichment analysis (GSEA) revealed consistent responses at a pathway level between 29 days and 56 days of spaceflight. This included widespread downregulation of the components of the intestinal immune system after spaceflight, including intestinal immune network for IgA production, antigen processing and presentation, Th1 and Th2 cell differentiation, PARR signalling metabolism of xenobiotics, *Staphylococcus aureus* infection, T cell

receptor signalling, natural killer cell mediated cytotoxicity, graft-vs-host disease and cytokine-cytokine receptor interactions pathways, as well as downregulation of cholesterol pathways, including cholesterol metabolism and steroid hormone biosynthesis. Spaceflight also led to common upregulation of pathways associated to intestinal extracellular matrix (ECM) remodelling, including ECM-receptor interactions, focal adhesion, tight junction, gap junction pathways, and cortisol production represented through the Cushing syndrome pathway. The bile secretion pathway was significantly upregulated after 29 days of spaceflight, but downregulated after 56 days, suggesting bile acid dynamics should be explored at the gene level. Similarly, mucin type O-glycan biosynthesis, pathways in cancer and insulin resistance were only upregulated at the pathway level after 29 days of spaceflight, while bacterial invasion of epithelial cells, NAFLD, butanoate metabolism, insulin secretion and insulin signalling pathways were upregulated and the circadian rhythm pathway was downregulated after only 56 days of spaceflight.

652 Figure 6

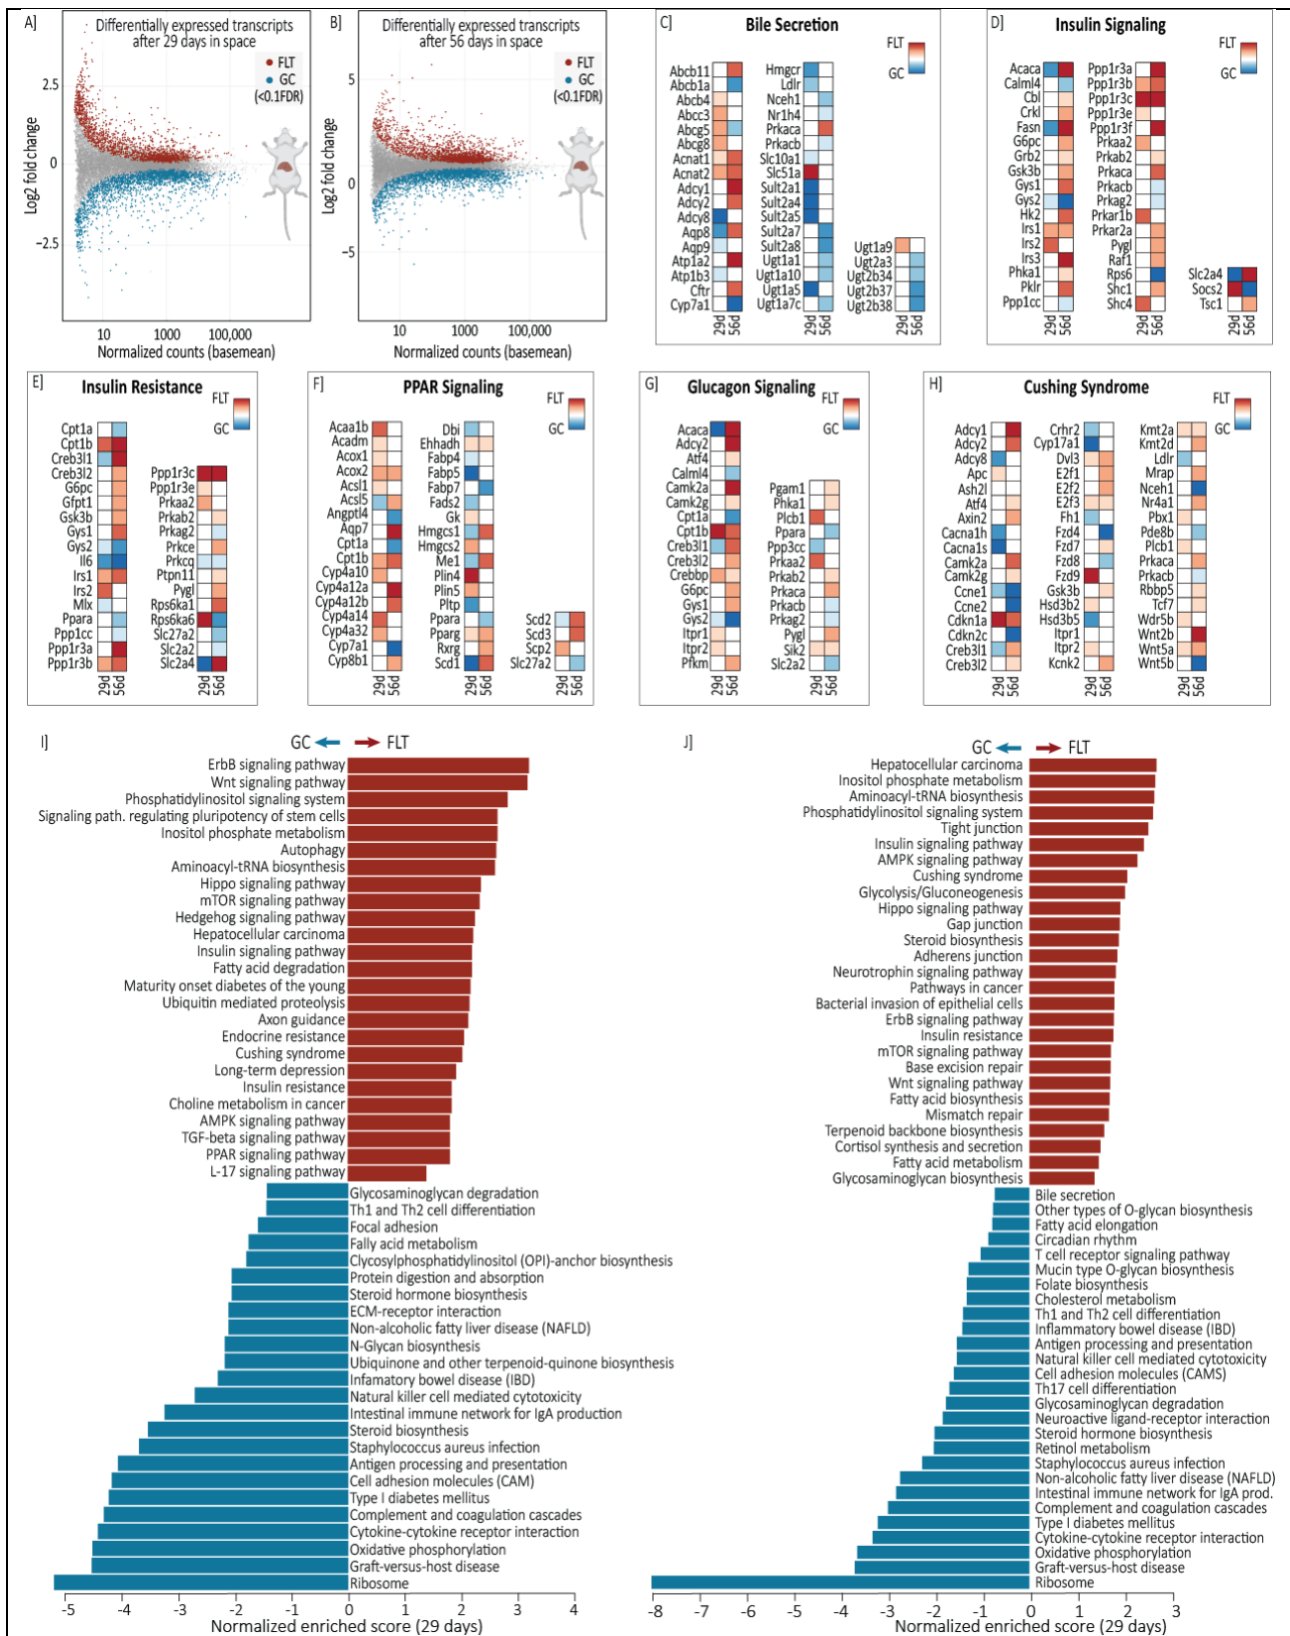

**Figure 6 Microbiome-host metabolism: spaceflight alters liver gene expression**

MA plots showing A) GC\_LAR vs FLT\_LAR (29 days of spaceflight) and B) GC\_ISS vs FLT\_ISS (56 days of spaceflight) differentially expressed genes in the liver (FDR < 0.1). Differentially expressed gene from select KEGG pathways of interest, I) Significant Gene Set Enrichment Analysis (GSEA) 29 days (modified from WebGestalt<sup>187</sup>), and J) Significant GSEA 56 days spaceflight. Full DE gene list is available in Supplementary File 5 and select KEGG pathways of interest with differentially expressed gene highlighted are available in Supplementary document 1. GSEA of liver tissue responses also revealed highly consistent responses at the pathway level to 29 and 56 days of spaceflight. These comprised downregulation of immune response pathways, similar to those seen in the intestine,

as well as steroid metabolism, type I diabetes mellitus, inflammatory bowel disease and NAFLD. Spaceflight also led to common upregulation of insulin resistance, Hippo signalling, inositol phosphate metabolism, Cushing syndrome and hepatocellular cancer pathways at both 29 and 56 days. Certain pathways were different over time. After 29 days of spaceflight, long-term depression and maturity onset diabetes of the young pathways were upregulated, whereas after 56 days, bile secretion and circadian rhythm were downregulated, while glycolysis/gluconeogenesis pathway were upregulated.

## 653 References

- 654 1 ISECG. Vol. 3 (ed The International Space Exploration Coordination Group) (National Aeronautics  
655 and Space Administration Headquarters, Washington, DC 20546-0001, 2018).
- 656 2 ISECG. (ed Washington National Aeronautics and Space Administration Headquarters, DC 20546-  
657 0001) (2022).
- 658 3 Administration, N. A. a. S. (ed NASA) (2022).
- 659 4 Administration, N. A. a. S. (NASA, 2022).
- 660 5 Stein, T., Schuller, M. & Boden, G. Development of insulin resistance by astronauts during  
661 spaceflight. *Aviation, space, and environmental medicine* **65**, 1091-1096 (1994).
- 662 6 Hughson, R. L. *et al.* Increased postflight carotid artery stiffness and inflight insulin resistance  
663 resulting from 6-mo spaceflight in male and female astronauts. *American Journal of Physiology-  
664 Heart and Circulatory Physiology* **310**, H628-H638 (2016).
- 665 7 Tobin, B. W., Leeper-Woodford, S. K., Hashemi, B. B., Smith, S. M. & Sams, C. F. Altered TNF- $\alpha$ ,  
666 glucose, insulin, and amino acids in islets of Langerhans cultured in a microgravity model system.  
667 *American Journal of Physiology-Endocrinology and Metabolism* **280**, E92-E102 (2001).
- 668 8 Mondon, C., Rodnick, K., Dolkas, C., Azhar, S. & Reaven, G. Alterations in glucose and protein  
669 metabolism in animals subjected to simulated microgravity. *Advances in Space Research* **12**, 169-  
670 177 (1992).
- 671 9 Gambará, G. *et al.* Microgravity-induced transcriptome adaptation in mouse paraspinal longissimus  
672 dorsi muscle highlights insulin resistance-linked genes. *Frontiers in physiology* **8**, 279 (2017).
- 673 10 Espinosa-Jeffrey, A. *et al.* Simulated microgravity enhances oligodendrocyte mitochondrial function  
674 and lipid metabolism. *Journal of neuroscience research* **94**, 1434-1450 (2016).
- 675 11 Meyers, V. E., Zayzafoon, M., Douglas, J. T. & McDonald, J. M. RhoA and cytoskeletal disruption  
676 mediate reduced osteoblastogenesis and enhanced adipogenesis of human mesenchymal stem  
677 cells in modeled microgravity. *Journal of Bone and Mineral Research* **20**, 1858-1866 (2005).
- 678 12 Liu, H., Li, D., Zhang, R., Sun, L. & Wang, D. Lipid metabolic sensors of MDT-15 and SBP-1 regulated  
679 the response to simulated microgravity in the intestine of *Caenorhabditis elegans*. *Biochemical and  
680 Biophysical Research Communications* **528**, 28-34 (2020).
- 681 13 Abraham, S., Lin, C., Klein, H. & Volkmann, C. The effects of space flight on some rat liver enzymes  
682 regulating carbohydrate and lipid metabolism. *Advances in Space Research* **1**, 199-217 (1981).
- 683 14 Merrill Jr, A. H. *et al.* Altered carbohydrate, lipid, and xenobiotic metabolism by liver from rats  
684 flown on Cosmos 1887. *The FASEB journal* **4**, 95-100 (1990).
- 685 15 Yakovleva, V. *Arkhiv Anat Gistolgli i. Embriologii* **73**, 39 (1977).
- 686 16 Jonscher, K. R. *et al.* Spaceflight activates lipotoxic pathways in mouse liver. *Plos One* **11**, e0152877  
687 (2016).
- 688 17 Beheshti, A. *et al.* Multi-omics analysis of multiple missions to space reveal a theme of lipid  
689 dysregulation in mouse liver. *Scientific reports* **9**, 1-13 (2019).
- 690 18 da Silveira, W. A. *et al.* Comprehensive multi-omics analysis reveals mitochondrial stress as a  
691 central biological hub for spaceflight impact. *Cell* **183**, 1185-1201. e1120 (2020).
- 692 19 Blaber, E. A., Pecaut, M. J. & Jonscher, K. R. Spaceflight activates autophagy programs and the  
693 proteasome in mouse liver. *Int J Mol Sci* **18**, 2062 (2017).
- 694 20 Suzuki, N. *et al.* Gene expression changes related to bone mineralization, blood pressure and lipid  
695 metabolism in mouse kidneys after space travel. *Kidney international* **101**, 92-105 (2022).
- 696 21 Sonnenfeld, G. The immune system in space and microgravity. *Medicine and science in sports and  
697 exercise* **34**, 2021-2027 (2002).
- 698 22 ElGindi, M. *et al.* May the force be with you (or not): The immune system under microgravity. *Cells*  
699 **10**, 1941 (2021).

- 700 23 Stervbo, U. *et al.* Gravitational stress during parabolic flights reduces the number of circulating  
701 innate and adaptive leukocyte subsets in human blood. *Plos One* **13**, e0206272 (2018).
- 702 24 Bigley, A. B. *et al.* NK cell function is impaired during long-duration spaceflight. *Journal of Applied*  
703 *Physiology* **126**, 842-853 (2019).
- 704 25 Paulsen, K. *et al.* Severe disruption of the cytoskeleton and immunologically relevant surface  
705 molecules in a human macrophageal cell line in microgravity—results of an in vitro experiment on  
706 board of the Shenzhou-8 space mission. *Acta Astronautica* **94**, 277-292 (2014).
- 707 26 Crucian, B. *et al.* Alterations in adaptive immunity persist during long-duration spaceflight. *npj*  
708 *Microgravity* **1**, 1-10 (2015).
- 709 27 Garrett-Bakelman, F. E. *et al.* The NASA Twins Study: A multidimensional analysis of a year-long  
710 human spaceflight. *Science* **364**, eaau8650 (2019).
- 711 28 Minerbi, A. *et al.* Altered microbiome composition in individuals with fibromyalgia. *Pain* (2019).
- 712 29 Collins, K. *et al.* Relationship between inflammation, the gut microbiota, and metabolic  
713 osteoarthritis development: studies in a rat model. *Osteoarthritis and Cartilage* **23**, 1989-1998  
714 (2015).
- 715 30 Zheng, D., Liwinski, T. & Elinav, E. Interaction between microbiota and immunity in health and  
716 disease. *Cell research* **30**, 492-506 (2020).
- 717 31 Howard, E. J., Lam, T. K. & Duca, F. A. The gut microbiome: connecting diet, glucose homeostasis,  
718 and disease. *Annual review of medicine* **73**, 469-481 (2022).
- 719 32 Utzschneider, K. M., Kratz, M., Damman, C. J. & Hullarg, M. Mechanisms linking the gut microbiome  
720 and glucose metabolism. *The Journal of Clinical Endocrinology & Metabolism* **101**, 1445-1454  
721 (2016).
- 722 33 Nadia H. Agha *et al.* *Stress Challenges and Immunity in Space*. (Springer International Publishing  
723 2020).
- 724 34 Mora, M. *et al.* Microorganisms in confined habitats: microbial monitoring and control of intensive  
725 care units, operating rooms, cleanrooms and the International Space Station. *Frontiers in*  
726 *microbiology* **7**, 1573 (2016).
- 727 35 Gonzalez, E., Pitre, F. & Brereton, N. ANCHOR: A 16S rRNA gene amplicon pipeline for microbial  
728 analysis of multiple environmental samples. *Environmental Microbiology* (2019).
- 729 36 Singh, N. K., Wood, J. M., Karouia, F. & Venkateswaran, K. Succession and persistence of microbial  
730 communities and antimicrobial resistance genes associated with International Space Station  
731 environmental surfaces. *Microbiome* **6**, 204 (2018).
- 732 37 Lang, J. M. *et al.* A microbial survey of the International Space Station (ISS). *PeerJ* **5**, e4029 (2017).
- 733 38 Jiang, P., Green, S. J., Chlipala, G. E., Turek, F. W. & Vitaterna, M. H. Reproducible changes in the gut  
734 microbiome suggest a shift in microbial and host metabolism during spaceflight. *Microbiome* **7**, 1-  
735 18 (2019).
- 736 39 Bedree, J. K. *et al.* Specific host metabolite and gut microbiome alterations are associated with  
737 bone loss during spaceflight. *Cell Reports* **42** (2023).
- 738 40 Stavnichuk, M., Mikolajewicz, N., Corlett, T., Morris, M. & Komarova, S. V. A systematic review and  
739 meta-analysis of bone loss in space travelers. *npj Microgravity* **6**, 1-9 (2020).
- 740 41 Comfort, P. *et al.* Effects of spaceflight on musculoskeletal health: a systematic review and meta-  
741 analysis, considerations for interplanetary travel. *Sports Medicine* **51**, 2097-2114 (2021).
- 742 42 Suzuki, T. *et al.* Nrf2 contributes to the weight gain of mice during space travel. *Communications*  
743 *biology* **3**, 1-14 (2020).
- 744 43 Smith, U. & Kahn, B. B. Adipose tissue regulates insulin sensitivity: role of adipogenesis, de novo  
745 lipogenesis and novel lipids. *Journal of internal medicine* **280**, 465-475 (2016).
- 746 44 Gutierrez, D. A., Puglisi, M. J. & Hasty, A. H. Impact of increased adipose tissue mass on  
747 inflammation, insulin resistance, and dyslipidemia. *Current diabetes reports* **9**, 26-32 (2009).
- 748 45 Vitry, G. *et al.* Muscle atrophy phenotype gene expression during spaceflight is linked to a  
749 metabolic crosstalk in both the liver and the muscle in mice. *Iscience* **25**, 105213 (2022).
- 750 46 Gao, Z. *et al.* Butyrate improves insulin sensitivity and increases energy expenditure in mice.  
751 *Diabetes* **58**, 1509-1517 (2009).
- 752 47 Zhang, T. *et al.* Butyrate ameliorates alcoholic fatty liver disease via reducing endotoxemia and  
753 inhibiting liver gasdermin D-mediated pyroptosis. *Annals of Translational Medicine* **9** (2021).



- 754 48 Priyadarshini, M., Kotlo, K. U., Dudeja, P. K. & Layden, B. T. Role of short chain fatty acid receptors  
755 in intestinal physiology and pathophysiology. *Comprehensive Physiology* **8**, 1091 (2018).
- 756 49 Lai, H.-C. *et al.* Gut microbiota modulates COPD pathogenesis: role of anti-inflammatory  
757 Parabacteroides goldsteinii lipopolysaccharide. *Gut* **71**, 309-321 (2022).
- 758 50 Hajjar, R. *et al.* Gut microbiota influence anastomotic healing in colorectal cancer surgery through  
759 modulation of mucosal proinflammatory cytokines. *Gut* (2022).
- 760 51 Le Roy, T. *et al.* Dysosmobacter welbionis gen. nov., sp. nov., isolated from human faeces and  
761 emended description of the genus Oscillibacter. *Int J Syst Evol Micr* **70**, 4851-4858 (2020).
- 762 52 Le Roy, T. *et al.* Dysosmobacter welbionis is a newly isolated human commensal bacterium  
763 preventing diet-induced obesity and metabolic disorders in mice. *Gut* **71**, 534-543 (2022).
- 764 53 Leone, V. *et al.* Effects of diurnal variation of gut microbes and high-fat feeding on host circadian  
765 clock function and metabolism. *Cell host & microbe* **17**, 681-689 (2015).
- 766 54 Klaering, K. *et al.* Intestinimonas butyriciproducens gen. nov., sp. nov., a butyrate-producing  
767 bacterium from the mouse intestine. *Int J Syst Evol Micr* **63**, 4606-4612 (2013).
- 768 55 Wang, Z. *et al.* Identification and characterization of a bile salt hydrolase from Lactobacillus  
769 salivarius for development of novel alternatives to antibiotic growth promoters. *Applied and  
770 environmental microbiology* **78**, 8795-8802 (2012).
- 771 56 Guzior, D. & Quinn, R.
- 772 57 Morinaga, K., Kusada, H. & Tamaki, H. Bile Salt Hydrolases with Extended Substrate Specificity  
773 Confer a High Level of Resistance to Bile Toxicity on Atopobiaceae Bacteria. *Int J Mol Sci* **23**, 10980  
774 (2022).
- 775 58 Ferrell, J. M. & Chiang, J. Y. Bile acid receptors and signaling crosstalk in the liver, gut and brain.  
776 *Liver Research* **5**, 105-118 (2021).
- 777 59 Marion, S. *et al.* Biogeography of microbial bile acid transformations along the murine gut. *Journal  
778 of lipid research* **61**, 1450-1463 (2020).
- 779 60 Winter, J. *et al.* Mode of action of steroid desmolase and reductases synthesized by Clostridium"  
780 scindens"(formerly Clostridium strain 19). *Journal of Lipid Research* **25**, 1124-1131 (1984).
- 781 61 Kitahara, M., Takamine, F., Imamura, T. & Benno, Y. Assignment of Eubacterium sp. VPI 12708 and  
782 related strains with high bile acid 7alpha-dehydroxylating activity to Clostridium scindens and  
783 proposal of Clostridium hylemonae sp. nov., isolated from human faeces. *Int J Syst Evol Micr* **50**,  
784 971-978 (2000).
- 785 62 Streidl, T. *et al.* The gut bacterium Extibacter muris produces secondary bile acids and influences  
786 liver physiology in gnotobiotic mice. *Gut Microbes* **13**, 1854008 (2021).
- 787 63 Zagoskin, P. & Erlykina, E. Bile acids as a new type of steroid hormones regulating nonspecific  
788 energy expenditure of the body. *Современные технологии в медицине* **12**, 114-127 (2020).
- 789 64 Thibaut, M. M. & Bindels, L. B. Crosstalk between bile acid-activated receptors and microbiome in  
790 entero-hepatic inflammation. *Trends in Molecular Medicine* (2022).
- 791 65 Molinaro, A., Wahlström, A. & Marschall, H.-U. Role of bile acids in metabolic control. *Trends in  
792 Endocrinology & Metabolism* **29**, 31-41 (2018).
- 793 66 Wahlström, A., Sayin, S. I., Marschall, H.-U. & Bäckhed, F. Intestinal crosstalk between bile acids and  
794 microbiota and its impact on host metabolism. *Cell metabolism* **24**, 41-50 (2016).
- 795 67 Watanabe, M. *et al.* Bile acids induce energy expenditure by promoting intracellular thyroid  
796 hormone activation. *Nature* **439**, 484-489 (2006).
- 797 68 Thomas, C. *et al.* TGR5-mediated bile acid sensing controls glucose homeostasis. *Cell metabolism*  
798 **10**, 167-177 (2009).
- 799 69 MacDonald, P. E. *et al.* The multiple actions of GLP-1 on the process of glucose-stimulated insulin  
800 secretion. *Diabetes* **51**, S434-S442 (2002).
- 801 70 Honda, A. *et al.* Regulation of bile acid metabolism in mouse models with hydrophobic bile acid  
802 composition. *Journal of lipid research* **61**, 54-69 (2020).
- 803 71 Guo, G. L. & Chiang, J. Y. Is CYP2C70 the key to new mouse models to understand bile acids in  
804 humans? 1. *Journal of lipid research* **61**, 269-271 (2020).
- 805 72 Jiao, T.-y., Ma, Y.-d., Guo, X.-z., Ye, Y.-f. & Xie, C. Bile acid and receptors: biology and drug discovery  
806 for nonalcoholic fatty liver disease. *Acta Pharmacologica Sinica* **43**, 1103-1119 (2022).

- 807 73 Watanabe, S. & Fujita, K. Dietary hyodeoxycholic acid exerts hypolipidemic effects by reducing  
808 farnesoid X receptor antagonist bile acids in mouse enterohepatic tissues. *Lipids* **49**, 963-973  
809 (2014).
- 810 74 De Marino, S. *et al.* Hyodeoxycholic acid derivatives as liver X receptor  $\alpha$  and G-protein-coupled bile  
811 acid receptor agonists. *Scientific reports* **7**, 1-13 (2017).
- 812 75 Lepercq, P. *et al.* Isolates from normal human intestinal flora but not lactic acid bacteria exhibit  $7\alpha$ -  
813 and  $7\beta$ -hydroxysteroid dehydrogenase activities. *Microbial Ecology in Health and Disease* **16**, 195-  
814 201 (2004).
- 815 76 Crucian, B. E. *et al.* Immune system dysregulation during spaceflight: potential countermeasures for  
816 deep space exploration missions. *Frontiers in immunology* **9**, 1437 (2018).
- 817 77 Buffie, C. G. *et al.* Precision microbiome reconstitution restores bile acid mediated resistance to  
818 *Clostridium difficile*. *Nature* **517**, 205 (2015).
- 819 78 Sun, R., Xu, C., Feng, B., Gao, X. & Liu, Z. Critical roles of bile acids in regulating intestinal mucosal  
820 immune responses. *Therapeutic advances in gastroenterology* **14**, 17562848211018098 (2021).
- 821 79 Kuno, T., Hirayama-Kurogi, M., Ito, S. & Ohtsuki, S. Reduction in hepatic secondary bile acids caused  
822 by short-term antibiotic-induced dysbiosis decreases mouse serum glucose and triglyceride levels.  
823 *Scientific Reports* **8**, 1253 (2018).
- 824 80 Dawson, P. A. & Karpen, S. J. Intestinal transport and metabolism of bile acids. *Journal of lipid*  
825 *research* **56**, 1085-1099 (2015).
- 826 81 Buckley, D. B. & Klaassen, C. D. Induction of mouse UDP-glucuronosyltransferase mRNA expression  
827 in liver and intestine by activators of aryl-hydrocarbon receptor, constitutive androstane receptor,  
828 pregnane X receptor, peroxisome proliferator-activated receptor  $\alpha$ , and nuclear factor erythroid 2-  
829 related factor 2. *Drug Metabolism and Disposition* **37**, 847-856 (2009).
- 830 82 Katafuchi, T. & Makishima, M. Molecular basis of bile acid-FXR-FGF15/19 signaling axis. *Int J Mol Sci*  
831 **23**, 6046 (2022).
- 832 83 Erickson, S. K. *et al.* Hypercholesterolemia and changes in lipid and bile acid metabolism in male  
833 and female cyp7A1-deficient mice. *Journal of lipid research* **44**, 1001-1009 (2003).
- 834 84 Anselm, V., Novikova, S. & Zgoda, V. Re-adaption on earth after spaceflights affects the mouse liver  
835 proteome. *Int J Mol Sci* **18**, 1763 (2017).
- 836 85 Jakulj, L. *et al.* Transintestinal cholesterol transport is active in mice and humans and controls  
837 ezetimibe-induced fecal neutral sterol excretion. *Cell metabolism* **24**, 783-794 (2016).
- 838 86 Da Silva, T. C., Polli, J. E. & Swaan, P. W. The solute carrier family 10 (SLC10): beyond bile acid  
839 transport. *Molecular aspects of medicine* **34**, 252-269 (2013).
- 840 87 Zhao, C. & Dahlman-Wright, K. Liver X receptor in cholesterol metabolism. *Journal of Endocrinology*  
841 **204**, 233-240 (2010).
- 842 88 Peet, D. J. *et al.* Cholesterol and bile acid metabolism are impaired in mice lacking the nuclear  
843 oxysterol receptor LXR $\alpha$ . *Cell* **93**, 693-704 (1998).
- 844 89 Uppal, H. *et al.* Activation of LXRs prevents bile acid toxicity and cholestasis in female mice.  
845 *Hepatology* **45**, 422-432 (2007).
- 846 90 Repa, J. J. *et al.* Regulation of ATP-binding cassette sterol transporters ABCG5 and ABCG8 by the  
847 liver X receptors  $\alpha$  and  $\beta$ . *Journal of Biological Chemistry* **277**, 18793-18800 (2002).
- 848 91 Fan, J. *et al.* Retinoic acid receptor-related orphan receptors: critical roles in tumorigenesis.  
849 *Frontiers in Immunology* **9**, 1187 (2018).
- 850 92 Voigt, R. M., Forsyth, C. B. & Keshavarzian, A. Circadian rhythms: a regulator of gastrointestinal  
851 health and dysfunction. *Expert review of gastroenterology & hepatology* **13**, 411-424 (2019).
- 852 93 Nakashima, A. *et al.* DEC1 modulates the circadian phase of clock gene expression. *Mol Cell Biol* **28**,  
853 4080-4092 (2008).
- 854 94 Pearson, J. A., Wong, F. S. & Wen, L. Crosstalk between circadian rhythms and the microbiota.  
855 *Immunology* **161**, 278-290 (2020).
- 856 95 Butler, T. D. & Gibbs, J. E. Circadian host-microbiome interactions in immunity. *Frontiers in*  
857 *immunology* **11**, 1783 (2020).
- 858 96 Malhan, D., Yalçın, M., Schoenrock, B., Blottner, D. & Relógio, A. Skeletal muscle gene expression  
859 dysregulation in long-term spaceflights and aging is clock-dependent. *npj Microgravity* **9**, 30 (2023).

- 860 97 Yu, Z. *et al.* Circadian rhythms and bile acid homeostasis: a comprehensive review. *Chronobiology*  
861 *international* **37**, 618-628 (2020).
- 862 98 Frazier, K. & Chang, E. B. Intersection of the gut microbiome and circadian rhythms in metabolism.  
863 *Trends in Endocrinology & Metabolism* **31**, 25-36 (2020).
- 864 99 Mukherji, A., Kobiita, A., Ye, T. & Chambon, P. Homeostasis in intestinal epithelium is orchestrated  
865 by the circadian clock and microbiota cues transduced by TLRs. *Cell* **153**, 812-827 (2013).
- 866 100 Kim, M. H., Kang, S. G., Park, J. H., Yanagisawa, M. & Kim, C. H. Short-chain fatty acids activate  
867 GPR41 and GPR43 on intestinal epithelial cells to promote inflammatory responses in mice.  
868 *Gastroenterology* **145**, 396-406. e310 (2013).
- 869 101 Takahashi, K., Ip, W. E., Michelow, I. C. & Ezekowitz, R. A. B. The mannose-binding lectin: a  
870 prototypic pattern recognition molecule. *Curr Opin Immunol* **18**, 16-23 (2006).
- 871 102 Wang, Y. *et al.* The intestinal microbiota regulates body composition through NFIL3 and the  
872 circadian clock. *Science* **357**, 912-916 (2017).
- 873 103 Čaja, F. *et al.* Immune activation by microbiome shapes the colon mucosa: Comparison between  
874 healthy rat mucosa under conventional and germ-free conditions. *Journal of Immunotoxicology* **18**,  
875 37-49 (2021).
- 876 104 Cornick, S., Tawiah, A. & Chadee, K. Roles and regulation of the mucus barrier in the gut. *Tissue*  
877 *barriers* **3**, e982426 (2015).
- 878 105 Johansson, M. E., Larsson, J. M. H. & Hansson, G. C. The two mucus layers of colon are organized by  
879 the MUC2 mucin, whereas the outer layer is a legislator of host–microbial interactions. *Proceedings*  
880 *of the national academy of sciences* **108**, 4659-4665 (2011).
- 881 106 Khan, W. & Collins, S. Immune-mediated alteration in gut physiology and its role in host defence in  
882 nematode infection. *Parasite immunology* **26**, 319-326 (2004).
- 883 107 Hubo, M. *et al.* Costimulatory molecules on immunogenic versus tolerogenic human dendritic cells.  
884 *Frontiers in immunology* **4**, 82 (2013).
- 885 108 Kato, K. *et al.* CD48 is a counter-receptor for mouse CD2 and is involved in T cell activation. *The*  
886 *Journal of experimental medicine* **176**, 1241-1249 (1992).
- 887 109 Kim, Y. *et al.* Activated leucocyte cell adhesion molecule (ALCAM/CD166) regulates T cell responses  
888 in a murine model of food allergy. *Clinical & Experimental Immunology* **192**, 151-164 (2018).
- 889 110 Hirata, Y., Egea, L., Dann, S. M., Eckmann, L. & Kagnoff, M. F. GM-CSF-facilitated dendritic cell  
890 recruitment and survival govern the intestinal mucosal response to a mouse enteric bacterial  
891 pathogen. *Cell host & microbe* **7**, 151-163 (2010).
- 892 111 Ajuebor, M. N. & Swain, M. G. Role of chemokines and chemokine receptors in the gastrointestinal  
893 tract. *Immunology* **105**, 137-143 (2002).
- 894 112 Andrews, C., McLean, M. H. & Durum, S. K. Cytokine tuning of intestinal epithelial function.  
895 *Frontiers in immunology* **9**, 1270 (2018).
- 896 113 Kulkarni, N., Pathak, M. & Lal, G. Role of chemokine receptors and intestinal epithelial cells in the  
897 mucosal inflammation and tolerance. *Journal of Leucocyte Biology* **101**, 377-394 (2017).
- 898 114 Song, X., He, X., Li, X. & Qian, Y. The roles and functional mechanisms of interleukin-17 family  
899 cytokines in mucosal immunity. *Cellular & molecular immunology* **13**, 418-431 (2016).
- 900 115 Lee, Y., Clinton, J., Yao, C. & Chang, S. H. Interleukin-17D promotes pathogenicity during infection  
901 by suppressing CD8 T cell activity. *Frontiers in immunology* **10**, 1172 (2019).
- 902 116 Konieczny, P. *et al.* Interleukin-17 governs hypoxic adaptation of injured epithelium. *Science* **377**,  
903 eabg9302 (2022).
- 904 117 Wang, J. *et al.* Simulated microgravity suppresses MAPK pathway-mediated innate immune  
905 response to bacterial infection and induces gut microbiota dysbiosis. *The FASEB Journal* **34**, 14631-  
906 14644 (2020).
- 907 118 Pecaat, M. J. *et al.* Is spaceflight-induced immune dysfunction linked to systemic changes in  
908 metabolism? *Plos One* **12**, e0174174 (2017).
- 909 119 Benjamin, C. L. *et al.* Decreases in thymopoiesis of astronauts returning from space flight. *JCI insight*  
910 **1** (2016).
- 911 120 Akiyama, T. *et al.* How does spaceflight affect the acquired immune system? *npj Microgravity* **6**, 14  
912 (2020).

- 913 121 Zhu, X. *et al.* Non-coding 7S RNA inhibits transcription via mitochondrial RNA polymerase  
914 dimerization. *Cell* **185**, 2309-2323. e2324 (2022).
- 915 122 Chen, M. M., Hale, C., Stanislaus, S., Xu, J. & Véniant, M. M. FGF21 acts as a negative regulator of  
916 bile acid synthesis. *Journal of Endocrinology* **237**, 139-152 (2018).
- 917 123 Lin, H. *et al.* Paracrine fibroblast growth factor 1 functions as potent therapeutic agent for  
918 intrahepatic cholestasis by downregulating synthesis of bile acid. *Frontiers in pharmacology* **10**,  
919 1515 (2019).
- 920 124 Repa, J. J. & Mangelsdorf, D. J. The role of orphan nuclear receptors in the regulation of cholesterol  
921 homeostasis. *Annual review of cell and developmental biology* **16**, 459-481 (2000).
- 922 125 Kubitz, R., Dröge, C., Stindt, J., Weissenberger, K. & Häussinger, D. The bile salt export pump (BSEP)  
923 in health and disease. *Clinics and research in hepatology and gastroenterology* **36**, 536-553 (2012).
- 924 126 Hajeyah, A. A., Griffiths, W. J., Wang, Y., Finch, A. J. & O'Donnell, V. B. The biosynthesis of  
925 enzymatically oxidized lipids. *Frontiers in Endocrinology* **11**, 591819 (2020).
- 926 127 Alnouti, Y. Bile acid sulfation: a pathway of bile acid elimination and detoxification. *Toxicological*  
927 *Sciences* **108**, 225-246 (2009).
- 928 128 Wang, K. *et al.* Structure of mouse cytosolic sulfotransferase SULT2A8 provides insight into  
929 sulfonation of 7 $\alpha$ -hydroxyl bile acids. *Journal of lipid research* **62** (2021).
- 930 129 Shimohira, T., Kurogi, K., Liu, M.-C., Suiko, M. & Sakakibara, Y. The critical role of His48 in mouse  
931 cytosolic sulfotransferase SULT2A8 for the 7 $\alpha$ -hydroxyl sulfation of bile acids. *Bioscience,*  
932 *Biotechnology, and Biochemistry* **82**, 1359-1365 (2018).
- 933 130 Kim, M. S., Shigenaga, J., Moser, A., Grunfeld, C. & Feingold, K. R. Suppression of DHEA  
934 sulfotransferase (Sult2A1) during the acute-phase response. *American Journal of Physiology-*  
935 *Endocrinology and Metabolism* **287**, E731-E738 (2004).
- 936 131 Chen, M. L. *et al.* CAR directs T cell adaptation to bile acids in the small intestine. *Nature* **593**, 147-  
937 151 (2021).
- 938 132 Tripathi, A. *et al.* The gut–liver axis and the intersection with the microbiome. *Nature reviews*  
939 *Gastroenterology & hepatology* **15**, 397-411 (2018).
- 940 133 Qi, Y. *et al.* Bile acid signaling in lipid metabolism: metabolomic and lipidomic analysis of lipid and  
941 bile acid markers linked to anti-obesity and anti-diabetes in mice. *Biochimica et Biophysica Acta*  
942 *(BBA)-Molecular and Cell Biology of Lipids* **1851**, 19-29 (2015).
- 943 134 Chiang, J. Y. Targeting bile acids and lipotoxicity for NASH treatment. *Hepatology communications*  
944 **1**, 1002 (2017).
- 945 135 Yamamoto, H., Uramaru, N., Kawashima, A. & Higuchi, T. Carbonic anhydrase 3 increases during  
946 liver adipogenesis even in pre-obesity, and its inhibitors reduce liver adipose accumulation. *FEBS*  
947 *Open bio* **12**, 827-834 (2022).
- 948 136 Grajchen, E. *et al.* Fatty acid desaturation by stearoyl-CoA desaturase-1 controls regulatory T cell  
949 differentiation and autoimmunity. *Cellular & Molecular Immunology*, 1-14 (2023).
- 950 137 Thorens, B. GLUT2, glucose sensing and glucose homeostasis. *Diabetologia* **58**, 221-232 (2015).
- 951 138 Mandard, S. *et al.* Glycogen synthase 2 is a novel target gene of peroxisome proliferator-activated  
952 receptors. *Cell Mol Life Sci* **64**, 1145-1157 (2007).
- 953 139 Brereton, N., Pitre, F. & Gonzalez, E. Reanalysis of the Mars500 experiment reveals common gut  
954 microbiome alterations in astronauts induced by long-duration confinement. *Computational and*  
955 *Structural Biotechnology Journal* (2021).
- 956 140 Strollo, F. *et al.* Space Flight-Promoted Insulin Resistance as a Possible Disruptor of Wound Healing.  
957 *Frontiers in Bioengineering and Biotechnology* **10**, 868999 (2022).
- 958 141 Vinken, M. Hepatology in space: Effects of spaceflight and simulated microgravity on the liver. *Liver*  
959 *International* **42**, 2599-2606 (2022).
- 960 142 Cortés-Vieyra, R. *et al.* Glycogen synthase kinase 3 $\beta$  modulates the inflammatory response  
961 activated by bacteria, viruses, and parasites. *Frontiers in Immunology* **12**, 675751 (2021).
- 962 143 Ren, F. *et al.* Inhibition of glycogen synthase kinase 3 $\beta$  promotes autophagy to protect mice from  
963 acute liver failure mediated by peroxisome proliferator-activated receptor  $\alpha$ . *Cell death & disease*  
964 **7**, e2151-e2151 (2016).
- 965 144 Roehlen, N. *et al.* Treatment of HCC with claudin-1-specific antibodies suppresses carcinogenic  
966 signaling and reprograms the tumor microenvironment. *Journal of hepatology* **78**, 343-355 (2023).

- 967 145 Mei, J. *et al.* Systematic summarization of the expression profiles and prognostic roles of the  
968 dishevelled gene family in hepatocellular carcinoma. *Molecular Genetics & Genomic Medicine* **8**,  
969 e1384 (2020).
- 970 146 Chen, J., Gingold, J. A. & Su, X. Immunomodulatory TGF- $\beta$  signaling in hepatocellular carcinoma.  
971 *Trends in molecular medicine* **25**, 1010-1023 (2019).
- 972 147 Wolfrain, L. A., Walz, T. M., James, Z., Fernandez, T. & Letterio, J. J. p21Cip1 and p27Kip1 act in  
973 synergy to alter the sensitivity of naive T cells to TGF- $\beta$ -mediated G1 arrest through modulation of  
974 IL-2 responsiveness. *The Journal of Immunology* **173**, 3093-3102 (2004).
- 975 148 Reitz, G. *et al.* Space radiation measurements on-board ISS—the DOSMAP experiment. *Radiation*  
976 *Protection Dosimetry* **116**, 374-379 (2005).
- 977 149 Naqib, A. *et al.* PCR effects of melting temperature adjustment of individual primers in degenerate  
978 primer pools. *PeerJ* **7**, e6570 (2019).
- 979 150 Naqib, A. *et al.* Making and sequencing heavily multiplexed, high-throughput 16S ribosomal RNA  
980 gene amplicon libraries using a flexible, two-stage PCR protocol. *Gene expression analysis: Methods*  
981 *and protocols*, 149-169 (2018).
- 982 151 Gonzalez, E. *et al.* Distinct changes occur in the human breast milk microbiome between early and  
983 established lactation in breastfeeding Guatemalan mothers. *Frontiers in Microbiology* **12**, 194  
984 (2021).
- 985 152 Brereton, N., Gonzalez, E., Desjardins, D., Labrecque, M. & Pitre, F. Co-cropping with three  
986 phytoremediation crops influences rhizosphere microbiome community in contaminated soil. *Sci*  
987 *Total Environ*, 135067 (2019).
- 988 153 Porter, T. M. & Hajibabaei, M. Scaling up: A guide to high-throughput genomic approaches for  
989 biodiversity analysis. *Mol Ecol* **27**, 313-338 (2018).
- 990 154 Knight, R. *et al.* Best practices for analysing microbiomes. *Nature Reviews Microbiology*, 1 (2018).
- 991 155 Schloss, P. D. *et al.* Introducing mothur: open-source, platform-independent, community-supported  
992 software for describing and comparing microbial communities. *Applied and environmental*  
993 *microbiology* **75**, 7537-7541 (2009).
- 994 156 Love, M., Anders, S. & Huber, W. Differential analysis of count data—the DESeq2 package. *Genome*  
995 *Biol* **15**, 550 (2014).
- 996 157 Thorsen, J. *et al.* Large-scale benchmarking reveals false discoveries and count transformation  
997 sensitivity in 16S rRNA gene amplicon data analysis methods used in microbiome studies.  
998 *Microbiome* **4**, 62 (2016).
- 999 158 Weiss, S. *et al.* Normalization and microbial differential abundance strategies depend upon data  
1000 characteristics. *Microbiome* **5**, 27 (2017).
- 1001 159 Love, M. I., Huber, W. & Anders, S. Moderated estimation of fold change and dispersion for RNA-  
1002 seq data with DESeq2. *Genome Biol* **15**, 550 (2014).
- 1003 160 Krueger, F. *Trim Galore!*, <[https://www.bioinformatics.babraham.ac.uk/projects/trim\\_galore/](https://www.bioinformatics.babraham.ac.uk/projects/trim_galore/)>  
1004 (2012).
- 1005 161 *The British survey of fertiliser practice.* ([Rothamsted Experimental Station], 1983).
- 1006 162 Andrews, S. *FastQC: A quality control tool for high throughput sequence data.*,  
1007 <<https://www.bioinformatics.babraham.ac.uk/projects/fastqc/>> (2010).
- 1008 163 Bushnell, B. *BBMap: A Fast, Accurate, Splice-Aware Aligner*,  
1009 <<https://www.osti.gov/biblio/1241166>> (2014).
- 1010 164 Durai, D. A. & Schulz, M. H. In silico read normalization using set multi-cover optimization.  
1011 *Bioinformatics* **34**, 3273-3280, doi:10.1093/bioinformatics/bty307 (2018).
- 1012 165 Li, D. *et al.* MEGAHIT v1.0: A fast and scalable metagenome assembler driven by advanced  
1013 methodologies and community practices. *Methods* **102**, 3-11, doi:10.1016/j.ymeth.2016.02.020  
1014 (2016).
- 1015 166 Bray, N. L., Pimentel, H., Melsted, P. & Pachter, L. Near-optimal probabilistic RNA-seq  
1016 quantification. *Nat Biotechnol* **34**, 525-527, doi:10.1038/nbt.3519 (2016).
- 1017 167 Schaeffer, L., Pimentel, H., Bray, N., Melsted, P. & Pachter, L. Pseudoalignment for metagenomic  
1018 read assignment. *Bioinformatics* **33**, 2082-2088, doi:10.1093/bioinformatics/btx106 (2017).
- 1019 168 Hyatt, D. *et al.* Prodigal: prokaryotic gene recognition and translation initiation site identification.  
1020 *BMC Bioinformatics* **11**, 119, doi:10.1186/1471-2105-11-119 (2010).

- 1021 169 Altschul, S. F., Gish, W., Miller, W., Myers, E. W. & Lipman, D. J. Basic local alignment search tool. *J*  
1022 *Mol Biol* **215**, 403-410, doi:10.1016/S0022-2836(05)80360-2 (1990).
- 1023 170 Kanehisa, M., Sato, Y. & Morishima, K. BlastKOALA and GhostKOALA: KEGG Tools for Functional  
1024 Characterization of Genome and Metagenome Sequences. *J Mol Biol* **428**, 726-731,  
1025 doi:10.1016/j.jmb.2015.11.006 (2016).
- 1026 171 Kang, D. D. *et al.* MetaBAT 2: an adaptive binning algorithm for robust and efficient genome  
1027 reconstruction from metagenome assemblies. *PeerJ* **7**, e7359, doi:10.7717/peerj.7359 (2019).
- 1028 172 Parks, D. H., Imelfort, M., Skennerton, C. T., Hugenholtz, P. & Tyson, G. W. CheckM: assessing the  
1029 quality of microbial genomes recovered from isolates, single cells, and metagenomes. *Genome Res*  
1030 **25**, 1043-1055, doi:10.1101/gr.186072.114 (2015).
- 1031 173 von Meijenfeldt, F. A. B., Arkhipova, K., Cambuy, D. D., Coutinho, F. H. & Dutilh, B. E. Robust  
1032 taxonomic classification of uncharted microbial sequences and bins with CAT and BAT. *Genome Biol*  
1033 **20**, 217, doi:10.1186/s13059-019-1817-x (2019).
- 1034 174 Overbey, E. G. *et al.* NASA GeneLab RNA-seq consensus pipeline: standardized processing of short-  
1035 read RNA-seq data. *iScience* **24**, 102361, doi:10.1016/j.isci.2021.102361 (2021).
- 1036 175 McMurdie, P. J. & Holmes, S. phyloseq: an R package for reproducible interactive analysis and  
1037 graphics of microbiome census data. *PLoS One* **8**, e61217, doi:10.1371/journal.pone.0061217  
1038 (2013).
- 1039 176 Oksanen, J. *et al.* (2008).
- 1040 177 Love, M. I., Huber, W. & Anders, S. Moderated estimation of fold change and dispersion for RNA-  
1041 seq data with DESeq2. *Genome Biol* **15**, 550, doi:10.1186/s13059-014-0550-8 (2014).
- 1042 178 Kaul, A., Davidov, O. & Peddada, S. D. Structural zeros in high-dimensional data with applications to  
1043 microbiome studies. *Biostatistics* **18**, 422-433, doi:10.1093/biostatistics/kxw053 (2017).
- 1044 179 Ye, P., Qiao, X., Tang, W., Wang, C. & He, H. Testing latent class of subjects with structural zeros in  
1045 negative binomial models with applications to gut microbiome data. *Stat Methods Med Res* **31**,  
1046 2237-2254, doi:10.1177/09622802221115881 (2022).
- 1047 180 Strimmer, K. A unified approach to false discovery rate estimation. *BMC Bioinformatics* **9**, 303,  
1048 doi:10.1186/1471-2105-9-303 (2008).
- 1049 181 fdrtool: Estimation of (Local) False Discovery Rates and Higher Criticism (2021).
- 1050 182 Wu, T. *et al.* clusterProfiler 4.0: A universal enrichment tool for interpreting omics data. *Innovation*  
1051 *(Camb)* **2**, 100141, doi:10.1016/j.xinn.2021.100141 (2021).
- 1052 183 Liao, Y., Wang, J., Jaehnig, E. J., Shi, Z. & Zhang, B. WebGestalt 2019: gene set analysis toolkit with  
1053 revamped UIs and APIs. *Nucleic Acids Res* **47**, W199-W205, doi:10.1093/nar/gkz401 (2019).
- 1054 184 Xiao, Y. *et al.* A novel significance score for gene selection and ranking. *Bioinformatics* **30**, 801-807,  
1055 doi:10.1093/bioinformatics/btr671 (2014).
- 1056 185 org.Mm.eg.db: Genome wide annotation for Mouse (2022).
- 1057 186 Glover, J. S., Ticer, T. D. & Engevik, M. A. Characterizing the mucin-degrading capacity of the human  
1058 gut microbiota. *Scientific reports* **12**, 8456 (2022).
- 1059 187 Liao, Y., Wang, J., Jaehnig, E. J., Shi, Z. & Zhang, B. WebGestalt 2019: gene set analysis toolkit with  
1060 revamped UIs and APIs. *Nucleic acids research* **47**, W199-W205 (2019).

1061
